# Supplementary material for: Measuring ability to assess claims about treatment effects: a latent trait analysis of items from the ‘Claim Evaluation Tools’ database using Rasch modelling
Source: PubMed Central journal article supplement — BMJ Open. 2017 May 25;7(5):e013185. doi: 10.1136/bmjopen-2016-013185 (PMC5777469; doi:10.1136/bmjopen-2016-013185), 2017-05-25
Supplement: bmjopen-2016-013185.draft_revisions.pdf [file bmjopen-2016-013185.draft_revisions.pdf]

# BMJ Open

## Measuring ability to assess claims about treatment effects: A latent trait analysis of the "Claim Evaluation Tools" using Rasch modelling

|                                 |                                                                                                                                                                                                                                                                                                                                                                      |
|---------------------------------|----------------------------------------------------------------------------------------------------------------------------------------------------------------------------------------------------------------------------------------------------------------------------------------------------------------------------------------------------------------------|
| Journal:                        | <i>BMJ Open</i>                                                                                                                                                                                                                                                                                                                                                      |
| Manuscript ID                   | bmjopen-2016-013185                                                                                                                                                                                                                                                                                                                                                  |
| Article Type:                   | Research                                                                                                                                                                                                                                                                                                                                                             |
| Date Submitted by the Author:   | 06-Jul-2016                                                                                                                                                                                                                                                                                                                                                          |
| Complete List of Authors:       | Austvoll-Dahlgren, Astrid; Norwegian Institute Of Public Health, Gutteresrud, Øystein; Norwegian Centre for Science Education, University of Oslo<br>Nsangi, Allen; Makerere University College of Health Sciences, School of Medicine<br>Semakula, Daniel; Makerere University College of Health Sciences, Oxman, Andrew; Norwegian Health Services Research Centre |
| <b>Primary Subject Heading</b>: | Patient-centred medicine                                                                                                                                                                                                                                                                                                                                             |
| Secondary Subject Heading:      | Research methods, Public health, Health policy                                                                                                                                                                                                                                                                                                                       |
| Keywords:                       | evidence based medicine, health literacy, outcome measurement, multiple-choice, Rasch analysis, patient education                                                                                                                                                                                                                                                    |
|                                 |                                                                                                                                                                                                                                                                                                                                                                      |

SCHOLARONE™  
Manuscripts

1  
2  
3 **Measuring ability to assess claims about treatment effects: A latent trait**  
4 **analysis of the “Claim Evaluation Tools” using Rasch modelling**  
5  
6  
7

8  
9 **Astrid Austvoll-Dahlgren, Øystein Guttersrud, Allen Nsangi, Daniel Semakula, Andrew D. Oxman, The**  
10 **IHC group\***  
11

12 **Iain Chalmers**

13  
14 **Leila Cusack**

15  
16 **Claire Glenton**

17  
18 **Tammy Hoffmann**

19  
20 **Margaret Kaseje**

21  
22 **Simon Lewin**

23  
24 **Leah Atieno Marende**

25  
26 **Michael Mugisha**

27  
28 **Laetitia Nyirazinyoye**

29  
30 **Kjetil Olsen**

31  
32 **Matthew Oxman**

33  
34 **Sarah Rosenbaum**

35  
36 **Nelson K. Sewankambo**

37  
38 **Anne Marie Uwitonze**  
39

40  
41  
42 Astrid Austvoll-Dahlgren (corresponding author)

43 astrid.austvoll-dahlgren@fhi.no

44 +47 41294057

45 Norwegian Institute of Public Health

46 BOKS 7004 St.Olavsplass

47 0130 Oslo, Norway  
48  
49

50  
51 Øystein Guttersrud

52 oystein.guttersrud@naturfagsenteret.no

53 Norwegian Centre for Science Education, University of Oslo

54 Postboks 1106, Blindern 0317 Oslo, Norway  
55  
56  
57

1  
2  
3  
4  
5  
6 Allen Nsangi  
7 nsallen2000@yahoo.com  
8  
9 Makerere University College of Health Sciences.  
10 New Mulago Hospital Complex, Administration Building, Second Floor.  
11 P.O.Box 7072, Kampala Uganda  
12

13  
14 Daniel Semakula  
15 semakuladaniel@gmail.com  
16  
17 Makerere University College of Health Sciences.  
18 New Mulago Hospital Complex, Administration Building, Second Floor.  
19 P.O.Box 7072, Kampala Uganda  
20

21  
22 Andrew D. Oxman  
23 oxman@online.no  
24  
25 Norwegian Institute of Public Health  
26 BOKS 7004 St.Olavsplass  
27 0130 Oslo, Norway  
28  
29  
30  
31  
32  
33  
34  
35  
36  
37  
38  
39  
40  
41  
42  
43  
44

45  
46 **Keywords: evidence based medicine, shared decision making, health literacy, outcome measurement,**  
47  
48 **multiple-choice, patient education, Rasch analysis**  
49  
50  
51  
52  
53  
54  
55  
56  
57  
58  
59  
60

## Abstract

**Objectives:** To describe the psychometric testing including Rasch analysis of the Claim Evaluation Tools in English speaking populations in Uganda and Norway.

**Setting:** We developed the Claim Evaluation Tools to evaluate members of the public's ability to assess treatment claims to be used in two randomised trials. The Claim Evaluation Tools consists of a battery of objective and flexible multiple-choice items.

**Participants:** We administrated four subsets of multiple-choice items to 1114 people, of which 685 were children and 429 were adults (including 171 health professionals). We scored all items dichotomously. Individual item fit statistics were estimated using pairwise maximum likelihood estimation available in the RUMM2030 analysis package and marginal maximum likelihood estimation available in the ConQuest4 analysis package. Possible dimension violations and response violations of local independence were studied using the PCA/t-test procedure and by inspecting the residual correlation matrix. We analysed differential item functioning for available person factors using the RUMM2030.

**Results:** The four subsets had satisfactory reliability, and most items did not over or under discriminate or function differently across subgroups of participants. There was no important response dependence, and one unidimensional latent trait was identified. The items had high difficulty. The spread (standard deviation) in the variable «ability» was as expected.

**Conclusion:** These results suggest that the items are reliable in the settings in which they have been tested. Items with sub-optimal fit will be considered deleted or repaired. We encourage further testing of the Claim Evaluation Tools in other contexts. All items will be available on request for non-commercial use through the website Testing Treatments interactive ([www.testingtreatments.org](http://www.testingtreatments.org)).

## Strengths and limitations of this study

- To our knowledge, this is the first psychometric testing including Rasch analysis of a set of evaluation tools that objectively measure people's ability to apply Key Concepts people need to know to assess claims about treatment effects
- We have used robust methods in two settings to test the reliability of the items, allowing for evidence informed revisions of any items with sub-optimal fit
- Our analysis suggest that the items are reliable in these settings and can be used for evaluating the effects of interventions to promote understanding of the Key Concepts
- This study provides evidence of the reliability of the items in two contexts, and the fit with the Rasch model when used in other settings is unknown.
- The items tested in this study was tested in English in English speaking populations, the reliability of the items in other languages remains to be tested.

## Background

People are confronted with claims about treatment effects daily. This includes claims about the effects of changes in health behaviour, screening, other preventive interventions, therapeutic interventions, rehabilitation, and public health and health system interventions that are targeted at groups of people (1-4). Many of these claims are not based on evidence from fair comparisons of treatments, and many patients and health professionals alike don't have the necessary tools to assess the reliability of these claims (5-11). Being able to think critically and make informed decisions is essential for engaging patients in clinical decisions and citizens in policy decisions, and affects people's health and use of resources (10, 12-15).

The aim of the Informed Healthcare Choices (IHC) project is to develop and evaluate learning resources to help people to assess treatment claims and make informed healthcare choices. The project has developed primary school resources and a podcast series to improve the ability of children and their parents to assess claims about treatment effects. We have piloted these resources in Uganda, Kenya, Rwanda and Norway, and the effects of the resources will be tested in randomized trials in Uganda (16, 17).

Until recently, there has not been a list of the Key Concepts that people must be able to understand and apply in order to assess claims about the effects of treatments. The development of such a list was the starting point for developing the IHC resources and the Claim Evaluation Tools, which will be used to evaluate the effects of the resources (18). Although a large number of studies have been conducted in different areas to improve critical thinking skills related to one or more of these Key Concepts, this research is heterogeneous and outcomes are measured inconsistently (19). Furthermore, available

1  
2  
3 instruments used to map or evaluate people's understanding of claims about treatment effects include  
4  
5 only a handful of the Key Concepts (19). Given this diverse, international interest, a set of tools is  
6  
7 needed both to evaluate the effects of interventions to promote understanding of the Key Concepts and  
8  
9 to assess the extent to which people are able to assess claims about treatments and make informed  
10  
11 healthcare choices.  
12  
13

14  
15  
16  
17 The Claim Evaluation Tools consist of a battery of open-access, objective multiple-choice items  
18  
19 addressing each of the Key Concepts. Researchers, teachers and others can select those that are  
20  
21 relevant for specific populations or purposes. The items includes scenarios intended to be relevant  
22  
23 across different contexts. They can be used for children (from ages 10 and up) and adults, including both  
24  
25 patients and health professionals (20). In another paper we have described the iterative development of  
26  
27 the Claim Evaluation Tools, including qualitative and quantitative feedback from experts and end-users  
28  
29 in Uganda, Kenya, Rwanda, Norway, United Kingdom and Australia (20). Based on suggested revisions by  
30  
31 experts and end-users, we tailored the item content and formats with the intention of improving the  
32  
33 reliability and validity of assessments. The items were found to have face validity by people with  
34  
35 expertise in methodology, and end-users judged the items to be relevant and acceptable in their  
36  
37 settings (see figure 1 for example of format). The Claim Evaluation Tools were developed in English, but  
38  
39 is currently being translated into Lugandan (Uganda), Norwegian, German, Spanish (Mexico), and  
40  
41 Chinese. This paper describes the psychometric testing including Rasch analysis of a sub-set of the Claim  
42  
43 Evaluation Tools administered in English in English speaking populations in Uganda and Norway.  
44  
45  
46  
47  
48  
49  
50  
51

52 *Please enter figure 1. Example of format*  
53  
54  
55  
56  
57  
58  
59  
60

1  
2  
3 Rasch analysis relies on item response theory and is based on the requirement that the comparison of  
4 two people are independent of which items are used within the set of items assessing the same variable  
5  
6 (21-24). Furthermore, in the Rasch model the total score across items completely describes a person's  
7  
8 standing on a variable. Rasch analysis has been used successfully in many disciplines including health  
9  
10 research, and can be applied to both dichotomous and polytomous data (21, 25, 26). Rasch analysis is  
11  
12 used to check the degree to which this scoring and summing-up across items is defensible in the data  
13  
14 collected (21, 23, 25). For example, if you want to compare the ability to assess claims in two groups,  
15  
16 such as patients and health professionals, it is important to be sure that the items work in the same way  
17  
18 in the two groups. Rasch analysis also provides an excellent basis for revising individual items. When  
19  
20 checking the items' fit to the Rasch model, misfit to the model can be easily diagnosed and items can be  
21  
22 revised to improve fit (27). In this way, the Rasch analysis represents a dynamic approach to achieving  
23  
24 construct validity, in which revisions are informed by the evidence (27).  
25  
26  
27  
28  
29  
30  
31  
32

## 33 **Objective**

34  
35  
36 To describe the psychometric testing and Rasch analysis of the Claim Evaluation Tools in Uganda and  
37  
38 Norway.  
39  
40  
41  
42  
43

## 44 **Methods**

### 45 **Rasch analysis and item response theory**

46  
47 Item response theory focuses on individual item responses and observed "trait" score estimates (28). A  
48  
49 trait refers to a person attribute. In this paper, a person trait score estimate or person location estimate  
50  
51  $\beta$  refers to the attribute "ability to critically assess claims about treatment effects" and an item difficulty  
52  
53 or item location estimate  $\delta$  refers to an item's difficulty.  
54  
55  
56  
57  
58  
59  
60



1  
2  
3 The item response theory model referred to as the simple logistic Rasch model for dichotomous  
4 responses is represented mathematically as  $P(x=1)=\exp(\beta-\delta)/(1+\exp(\beta-\delta))$ . It models the probability P of  
5 a correct answer ( $x=1$ ) as the difference between the item difficulty and the person ability  $\beta-\delta$  expressed  
6 in logits. The unit “logit” or “log-odds unit” refers to  $\ln[(\text{probability of success})/(\text{probability of}$   
7 failure)]= $\beta-\delta$  (24). When the item difficulty matches the person ability,  $\beta=\delta$  and the probability of a  
8 correct answer is 0.5 or 50%. When  $\beta>\delta$  or  $\beta<\delta$  the probability of answering correctly is above or below  
9 50%, respectively.

10  
11  
12  
13  
14  
15  
16  
17  
18  
19  
20 When data conform to the Rasch model, ability is measured consistently across the trait level scale with  
21 low measurement error. Hence, reliability follows from the Rasch model. In item response theory,  
22 measurement error is calculated as the standard error of estimate (SE of estimate= $1/\sqrt{I}$ ) being the  
23 inverse of the square root of the test information (I). SE of estimate varies across the trait level  
24 scale as we tend to be better at measuring persons where there is more information i.e., more items  
25 telling us the strengths (correct answers) and weaknesses (wrong answers) of a person. As most items'  
26 difficulty is located close to the middle of the person ability distribution we tend to measure less well at  
27 the extremes where there are fewer items and accordingly less information. The precision of  
28 measurement is quantified by standard errors in item response theory. Another benefit of item  
29 response theory measurement is that the scale of measurement is an interval logit scale.

30  
31  
32  
33  
34  
35  
36  
37  
38  
39  
40  
41  
42  
43  
44 As mentioned above, Rasch analysis is a very useful tool for diagnosing problems with the items.

45  
46 Revisions can then be made to improve fit, either by revising or deleting response-options with sub-  
47 optimal fit, or by deleting whole items, informed by the evidence (27). This can be done by visual  
48 inspection of fit to the Item Characteristic Curve, Bonferroni adjusted high chi-square probability, and  
49 exploring the mean z-score by response alternative. The Item Characteristic Curve indicates the Rasch  
50  
51  
52  
53  
54  
55  
56  
57  
58  
59  
60

1  
2  
3 model's theoretically expected probability of answering correctly as a function of ability on the latent  
4  
5 trait scale (see Figure 2 for an example of an Item Characteristic Curve).  
6  
7

8  
9 *Please enter figure 2. The Item Characteristic Curve*

10  
11 The mean ability estimates of the four class intervals used to group the persons based on ability are  
12  
13 marked on the scale (in logits) (in this example taken from one of the Claim Evaluation Tools' item sets: -  
14  
15 1.83, -1.18, -0.70 and 0.50). The imposed observed values indicate the proportion of correct answer in  
16  
17 each interval. The inflection point (0.52, 0.50) refers to the item difficulty estimate (0.52) and the  
18  
19 probability of a correct answer (0.50) for the matching person ability. The dashed line is the upper  
20  
21 asymptote for probability. See Tables 1 and 2 for examples of difficulty and fit statistics and item mean  
22  
23 z-scores.  
24  
25  
26  
27

28  
29 *Please enter Table 1. Difficulty and fit statistics for the item*

30  
31  
32 *Please enter Table 2. Mean z-scores for the group choosing each response alternative*  
33  
34

35 When the data conform to the Rasch model, the person's ability (what we measure) and the items (our  
36  
37 measurement device) are independent. This is a necessary requirement of objective measurement  
38  
39 referred to as *specific objectivity* (29). This item-invariant measurement of persons and person-invariant  
40  
41 calibrations of items indicate *sample independence*. When the data conform to the Rasch model, the  
42  
43 raw score sum of responses to the items (a measurement at the ordinal level) is a *sufficient statistic*; i.e.,  
44  
45 it contains all the information needed to estimate the person location. The Rasch model transforms  
46  
47 ordinal data into an interval logit scale implying *additivity* on the scale (30-32). The requirement of  
48  
49 invariance follows from the Rasch model (22). If an item difficulty measure is different for two levels of a  
50  
51 person factor - that is, for two groups of respondents (for example children and adults) - that item  
52  
53 exhibits "within item bias" referred to as DIF and invariance is violated (33).  
54  
55  
56  
57

1  
2  
3 The local independence assumption presupposes unidimensional data and no response dependence  
4  
5 between pairs of items (24, 34). The requirement of unidimensionality is met when one latent trait  
6  
7 sufficiently explains the variance shared among the item responses. It follows from this that one variable  
8  
9 “explains” all the correlations between the items. If responding to the items requires abilities from two  
10  
11 or more dimensions, two or more latent traits are needed to account for the correlations between the  
12  
13 items. This indicates bi-dimensional or multidimensional data (i.e., a composite of several  
14  
15 unidimensional subscales), and we would fit a multidimensional Rasch model using the framework of  
16  
17 the Multidimensional Random Coefficients Multinomial Logit model to account for the correlations  
18  
19 between the unidimensional subscales (35). The prescriptive Rasch model is confirmatory and could, in  
20  
21 cases where the researchers are concerned about the dimensionality of their scale, be accompanied by  
22  
23 confirmatory factor analysis (CFA). If an item offers clues to solve a subsequent item or pairs of items  
24  
25 share specific similarities beyond what the latent trait(s) can account for, we refer to this as response  
26  
27 dependence. The result is redundancy in the data and inefficient measures. Multidimensionality and  
28  
29 response dependence violates the requirement of local independence.  
30  
31  
32  
33  
34  
35  
36  
37  
38  
39

#### 40 **Participants, setting and test administration**

41  
42 We included two samples in the psychometric testing of the items, a Ugandan sample including primary  
43  
44 school children (approximately age >10) and adults, and a Norwegian sample including primary school  
45  
46 children (approximately age >12). In both settings, the samples included people who had received some  
47  
48 training in the Key Concepts through the pilots of the IHC learning resources. The Ugandan sample  
49  
50 included health professionals. We recruited children, parents and other adults through our own  
51  
52  
53  
54  
55  
56  
57  
58  
59  
60

1  
2  
3 networks and through networks of teachers and journalists that were established at the start of the IHC  
4  
5 project (36, 37)  
6  
7

8  
9 For this evaluation, we used classical psychometric testing for reliability (Cronbach's Alpha), for which a  
10  
11 value of 0.7 or higher is considered adequate), and Rasch analysis. There is no consensus on the sample  
12  
13 size needed to perform a Rasch analysis (38). This is a pragmatic judgement that takes account of the  
14  
15 number of items being evaluated and the statistical power needed to identify DIF. We aimed to achieve  
16  
17 approximately 250 respondents for each of four item sets. We also chose to include a group of children  
18  
19 who had participated in a pilot of the IHC primary school resources at an international school in Norway.  
20  
21 Although this was a small sample, it would give us some indication of the fit to the Rasch model in an  
22  
23 international population, and provide information on difficulty and differential item functioning in the  
24  
25 two different settings. In both settings, we administered the Claim Evaluation Tools in English, since this  
26  
27 was the official school language in both the Norwegian International School as well as the Ugandan  
28  
29 Schools.  
30  
31  
32

33  
34 We administrated all items addressing 22 of the 32 concepts (see Figure 1 for example of format). We  
35  
36 judged ten of the 32 Key Concepts too difficult for people in our target groups in Uganda, and  
37  
38 consequently items addressing these Key Concepts were not addressed in the IHC resources that were  
39  
40 pilot tested (36, 37). Because of the large number of items to be tested, we distributed the items across  
41  
42 four sets (of which the small Norwegian sample only responded to one set of items). Demographic  
43  
44 variables included age (child/ adult), educational background (health professional or not health  
45  
46 professional) and exposure to the concepts through IHC interventions (yes/ no). In the development of  
47  
48 the Claim Evaluation Tools, low literacy skills were identified as a potential barrier in the Ugandan  
49  
50 setting (20). Consequently, literacy was a variable that could introduce DIF in the Claim Evaluation Tool  
51  
52 items data. To explore this, a four-item English reading test was included to explore text recognition and  
53  
54  
55  
56  
57  
58  
59  
60

1  
2  
3 understanding as an indication of the respondents' literacy level (see Appendix 1). The items were  
4 designed to resemble the multiple-choice items addressing the Key Concepts. The first two items  
5  
6 required the respondents to identify the correct text sequence in the scenario. The latter two items  
7  
8 assessed whether the respondent was able to integrate the information in the scenario.  
9  
10  
11

### 12 13 14 15 16 **The components of the Rasch analysis**

17  
18 We scored all items dichotomously. Individual item fit statistics, such as Bonferroni adjusted chi-square  
19  
20 probability, infit and t-value, were estimated using pairwise maximum likelihood estimation available in  
21  
22 RUMM2030 and marginal maximum likelihood estimation available in ConQuest4 (39-45). Possible  
23  
24 dimension violations and response violations of local independence were studied using the PCA/t-test  
25  
26 procedure and by inspecting the residual correlation matrix estimated in RUMM2030 (46).  
27  
28

29  
30 Dimensionality and response dependence might similarly be assessed using the unidimTest function in  
31  
32 the ltm R-package and the Q3 statistic in the sirt R-package, respectively (47, 48). Our analysis of DIF for  
33  
34 available person factors was carried out using RUMM2030.  
35  
36  
37  
38  
39  
40  
41

### 42 **Results**

43  
44  
45 The total sample included 1114 people, among whom 685 were children and 429 were adults (including  
46  
47 171 health professionals). Of these 1114 people, 329 had received some form of training related to the  
48  
49 Key Concepts. The Norwegian sample equalled 5% (59 respondents) out of the total respondents. The  
50  
51 respondents completed most of the items, and the mean number of missing or incorrectly filled in  
52  
53  
54  
55  
56  
57  
58  
59  
60

1  
2  
3 responses was <1%. Less than 1/3 responded correctly to all four reading test questions in the Ugandan  
4  
5 sample, indicating a low-literacy level in English in this particular sample.  
6  
7  
8  
9

### 10 11 12 **Item discrimination and fit**

13  
14  
15 Most of the items conformed well to the Rasch model and only a few items showed evidence of DIF. In  
16  
17 set 1 (the only set applied in both Uganda and Norway), six items had DIF based on setting (Norway and  
18  
19 Uganda). A few items in each of the four sets also had some DIF for age and group (see Table 3).  
20  
21

22  
23 *Please enter Table 3. Reliability, response dependency and DIF by item set*  
24  
25  
26  
27

### 28 **Targeting and reliability**

29  
30  
31 Cronbach's Alpha was satisfactory with the exception of set 4, which was below the desired threshold  
32  
33 (see Table 3). Overall, the items developed to assess claims about treatment effects had high difficulty in  
34  
35 the target population, with no very easy items. However, there were no extremely difficult items. The  
36  
37 observed logits for sets 1, 2, 3 and 4 were -0.81, -1.06, -1.15 and -1.15 respectively. The spread  
38  
39 (standard deviation) in the variable «ability» was as expected.  
40  
41  
42  
43  
44  
45  
46

### 47 **Possible dimension and response violation of local independence**

48  
49  
50 Results indicated that all four sets measured a sufficiently unidimensional latent trait. There were no  
51  
52 specific sub-dimensions measuring different traits. Hence, one major dimension governs the responses  
53  
54 to the items (use of principal component analysis of residuals/ dependent t-test procedure).  
55  
56  
57

1  
2  
3 Only weak dependence was found in two items for set 1 with a residual correlation of 0.21. We did not  
4  
5 observe any response dependence in the other three sets.  
6  
7

## 8 9 **Discussion**

10  
11 We have developed the Claim Evaluation Tools using qualitative and quantitative feedback from  
12  
13 methodologists and end-users in six countries. This study reports the findings of the first psychometric  
14  
15 testing conducted in two settings, Uganda and Norway, of items addressing 22 out of 32 Key Concepts.  
16  
17 Overall, we found that these subsets of the Claim Evaluation Tools had high reliability. Most of the items  
18  
19 did not over-or underdiscriminate, or function differently across subgroups of participants. No  
20  
21 important response dependence was identified, and all four sets measured a sufficiently unidimensional  
22  
23 latent trait. The findings of this study will inform decisions about revising or deleting items with sub-  
24  
25 optimal fit to the Rasch model.  
26  
27

28  
29 Feedback on the items from experts and end-users suggested that the items were difficult (20). Our  
30  
31 Rasch analysis confirmed this. Moreover, the respondents reading skills was found to be low in the  
32  
33 target population in Uganda. This suggests that efforts should be made to simplify the text in the  
34  
35 scenarios and editing the response options to improve readability. Removing response options in items  
36  
37 with sub-optimal fit to the Rasch model could also contribute in making the items less difficult.  
38  
39

40  
41 A limitation of this study is that we tested the items in only two settings, Uganda and Norway, and the  
42  
43 fit with the Rasch model when used in other settings is unknown. Although we found few items with  
44  
45 cross-cultural differential item functioning, any other application of the Claim Evaluation Tools in other  
46  
47 countries should be tested using Rasch analysis. Furthermore, we did not include gender in the analysis,  
48  
49 which could introduce DIF, and this will be explored in further testing.  
50  
51  
52  
53  
54  
55  
56  
57

1  
2  
3 There has been encouraging interest in using the Claim Evaluation Tools in settings other than the  
4 countries included in the IHC project, and researchers in Norway, Mexico, Germany and China are  
5 currently translating and testing the multiple-choice items in their settings. In addition, the items  
6 addressing the Key Concepts judged to be more advanced and which were not tested as part of this  
7 study are currently being tested online through [testingtreatments.org](http://testingtreatments.org) including people with expertise in  
8 evidence based medicine. We are also developing items to assess intended behaviours, attitudes  
9 towards assessing treatment claims and self-efficacy.  
10  
11  
12  
13  
14  
15  
16  
17  
18  
19  
20

21 All Claim Evaluation Tools will be freely available for non-commercial use on request through the Testing  
22 Treatments interactive website ([www.testingtreatments.org](http://www.testingtreatments.org)). We will tag individual items by the  
23 settings in which the items have been tested, including information about the people in which the item  
24 was tested, and how it was tested (qualitative feedback or psychometric testing). We will also make the  
25 item's properties based on any psychometric testing available, including information about reliability  
26 and difficulty (22, 24). We will tag items that have been newly developed or revised as 'new' and  
27 'awaiting assessment'. This will provide transparency and make the items easily accessible to those who  
28 would like to use them in teaching or for research activities.  
29  
30  
31  
32  
33  
34  
35  
36  
37  
38  
39  
40  
41

42 For the pilots and statistical tests performed as part of this development work, we scored the items as  
43 percent correct per item and calculated the overall percent correct responses across items for  
44 individuals. However, mean scores can be difficult to interpret. To supplement this, it is possible to use  
45 an absolute (criterion referenced) standard to set a passing score i.e. a cut score; e.g. for passing or  
46 failing. The judgement about the required level of achievement is pragmatic, and there are several ways  
47 of doing this (49-51). For the items that will be used in the trial of the resources, we will establish criteria  
48  
49  
50  
51  
52  
53  
54  
55  
56  
57  
58  
59  
60



1  
2  
3 referenced standards using a combination of a combination of Nedelsky's and Angoff's methods (16,  
4  
5 17)(43-46).  
6  
7  
8  
9

## 10 **Conclusion**

11  
12 Based on psychometric testing using Rasch analysis in Uganda and Norway, we found that the tested  
13  
14 instruments were reliable and most of the items conformed to the Rasch model. Taken together with  
15  
16 our previously reported findings, these results suggest that the Claim Evaluation Tools we have tested  
17  
18 are reliable and have face and construct validity in the settings in which they have been tested. Items  
19  
20 with sub-optimal fit will be considered deleted or repaired. We encourage further testing of the Claim  
21  
22 Evaluation Tools in other contexts.  
23  
24  
25  
26  
27  
28  
29  
30

## 31 **Authors' Contributions**

32  
33 AA, ØG, AO wrote the protocol and the IHC group provided comments to this protocol. The Claim  
34  
35 Evaluation Tools were developed by the IHC group. AA coordinated all of the development and  
36  
37 evaluation process with support from AO. DS, AN and KO performed the data collection and data entry  
38  
39 from the field testing. ØG and AA prepared the data files for the analysis, and ØG conducted the Rasch  
40  
41 analysis. AA authored this manuscript with significant input from the IHC group.  
42  
43  
44  
45  
46  
47  
48  
49

## 50 **Acknowledgements**

1  
2  
3 We are deeply grateful to all of the enthusiastic children, parents and teachers that contributed to this  
4  
5 project. We would also like to thank the IHC advisory panel, and the other researchers and  
6  
7 methodologists that provided their advice in the development process.  
8  
9

### 10 11 12 **Funding and competing interests**

13  
14 The IHC project is funded in part by the Research Council of Norway- GLOBVAC project 220603. The  
15  
16 authors declare no conflicts of interests.  
17  
18

### 19 20 21 **Ethical approval**

22  
23 Ethical approval was sought by the IHC project representatives in each country.  
24  
25

### 26 27 28 **Data sharing statement**

29  
30 All data are published as part of this study or can be found at datadryad.org. All Claim Evaluation Tools  
31  
32 are available upon request for non-commercial use.  
33  
34

### 35 36 37 **References**

- 38 1. Lewis M, Orrock P, Myers S. Uncritical reverence in CM reporting: Assessing the scientific quality  
39 of Australian news media reports. *Health Sociology Review*. 2010;19(1):57-72.
- 40 2. Glenton C, Paulsen E, Oxman A. Portals to Wonderland? Health portals lead confusing  
41 information about the effects of health care. *BMC Medical Informatics and Decision Making*. 2005;5:7:8.
- 42 3. Moynihan R, Bero L, Ross-Degnan D, Henry D, Lee K, Watkins J, et al. Coverage by the news  
43 media of the benefits and risks of medications. *The New England Journal of Medicine*.  
44 2000;342(22):1645-50.
- 45 4. Wolfe R, Sharp L, Lipsky M. Content and design attributes of antivaccination web sites. *Journal*  
46 *of American Medical Association*. 2002;287(24):3245-48.
- 47 5. Woloshin S, Schwartz L, Byram S, Sox H, Fischhoff B, Welch H. Women's understanding of the  
48 mammography screening debate. *Archives of Internal Medicine* 2000;160:1434-40.
- 49 6. Fox S, Duggan M. Health Online 2013 09.04.2013. Available from:  
50 <http://www.pewinternet.org/Reports/2013/Health-online.aspx>.
- 51 7. Robinson E, Kerr C, Stevens A, Lilford R, Brauholtz D, Edwards S, et al. Lay public's  
52 understanding of equipoise and randomisation in randomised controlled trials. Research Support, Non-  
53 U.S. Gov't. NHS R&D HTA Programme, 2005 Mar. Report No.: 1366-5278 (Linking) Contract No.: 8.  
54  
55  
56  
57  
58  
59  
60

- 1
  - 2
  - 3
  - 4
  - 5
  - 6
  - 7
  - 8
  - 9
  - 10
  - 11
  - 12
  - 13
  - 14
  - 15
  - 16
  - 17
  - 18
  - 19
  - 20
  - 21
  - 22
  - 23
  - 24
  - 25
  - 26
  - 27
  - 28
  - 29
  - 30
  - 31
  - 32
  - 33
  - 34
  - 35
  - 36
  - 37
  - 38
  - 39
  - 40
  - 41
  - 42
  - 43
  - 44
  - 45
  - 46
  - 47
  - 48
  - 49
  - 50
  - 51
  - 52
  - 53
  - 54
  - 55
  - 56
  - 57
  - 58
  - 59
  - 60
8. Sillence E, Briggs P, Harris PR, Fishwick L. How do patients evaluate and make use of online health information? *Social Science & Medicine*. 2007;64(9):1853-62.
9. Horsley T, Hyde C, Santesso N, Parkes J, Milne R, Stewart R. Teaching critical appraisal skills in healthcare settings. *Cochrane Database of Systematic Reviews*. 2011(11).
10. Evans I, Thornton H, Chalmers I, P. G. *Testing Treatments: better research for better healthcare*. Second edition. London: Pinter & Martin Ltd 2011. Available from: Available online at [www.testingtreatments.org/new-edition/](http://www.testingtreatments.org/new-edition/).
11. Chalmers I, Glasziou P., Badenoch D., Atkinson P., Austvoll-Dahlgren A., Oxman A. Evidence Live 2016: Promoting informed healthcare choices by helping people assess treatment claims. *BMJ*; 26.06.2016.
12. Taking shared decision making more seriously. *Lancet*. 2011;377(9768):784.
13. Shekelle PG, Pronovost PJ, Wachter RM, McDonald KM, Schoelles K, Dy SM, et al. The top patient safety strategies that can be encouraged for adoption now. *Annals of Internal Medicine*. 2013;158(5 Pt 2):365-8.
14. Stacey D, Légaré F, Col NF, Bennett CL, Barry MJ, Eden KB, et al. Decision aids for people facing health treatment or screening decisions. *Cochrane Database of Systematic Reviews 2014, Issue 1 Art No: CD001431 DOI: 101002/14651858CD001431pub4*.
15. Berkman N, Sheridan S, Donahue K, Halpern D, Crotty K. Low Health Literacy and Health Outcomes: An Updated Systematic Review. *Annals of Internal Medicine*. 2011;155(2):97-U89.
16. Nsangi A., Semakula D., Oxman M., Austvoll-Dahlgren A., Rosenbaum S., Kaseje M., et al. Evaluation of resources to teach children in low income countries to assess claims about treatment effects. Protocol for a randomized trial. Submitted manuscript. 2016.
17. Semakula D., Nsangi A., Oxman M., Austvoll-Dahlgren A., Rosenbaum S., Kaseje M., et al. Can an educational podcast improve the ability of parents of primary school children to assess claims about the benefits and harms of treatments? Protocol for a randomized trial Submitted manuscript. 2016.
18. Austvoll-Dahlgren A, Oxman AD, Chalmers I, Nsangi A, Glenton C, Lewin S, et al. Key concepts that people need to understand to assess claims about treatment effects. *Journal of Evidence-Based Medicine*. 2015;8(3):112-25.
19. Austvoll-Dahlgren A, Nsangi A, Semakula D. Key concepts people need to understand to assess claims about treatment effects: a systematic mapping review of interventions and evaluation tools. Submitted paper. 2016.
20. Austvoll-Dahlgren A, Semakula D, Nsangi A, Oxman A, Chalmers I, Rosenbaum S, et al. Measuring ability to assess claims about treatment effects: The development of the "Claim Evaluation Tools". Submitted paper. 2016.
21. Tennant A, Conaghan PG. The Rasch measurement model in rheumatology: what is it and why use it? When should it be applied, and what should one look for in a Rasch paper? *Arthritis Rheum*. 2007;57(8):1358-62.
22. Andrich D. *Rasch models for measurement*. Beverly Hills: Sage Publications; 1988.
23. Leonard M. *Rasch Promises: a Layman's Guide to the Rasch Method of Item Analysis*. Educational Research. 1980;22(3):188-92.
24. Rasch G. *Probabilistic Models for Some Intelligence and Achievement Tests*. Copenhagen: Danish Institute for Educational Research. Expanded Edition 1983: Chicago: MESA Press; 1960.
25. Guttersrud O, Dalane JO, Pettersen S. Improving measurement in nutrition literacy research using Rasch modelling: examining construct validity of stage-specific 'critical nutrition literacy' scales. *Public Health Nutr*. 2014;17(4):877-83.

- 1
- 2
- 3
- 4 26. Conaghan PG, Emerton M, Tennant A. Internal construct validity of the Oxford Knee Scale:  
5 evidence from Rasch measurement. *Arthritis Rheum.* 2007;57(8):1363-7.
- 6 27. Rasch analysis. <http://www.rasch-analysis.com/>. Accessed 2016.
- 7 28. Hambleton RK, Swaminathan H, Rogers HJ. Chapter 2. concepts models and features.  
8 *Fundamentals of Item Response Theory.* Newbery Park: Sage publications 1991. p. 7-31.
- 9 29. Stenner AJ. Specific objectivity - local and general. *Rasch Measurement Transactions*, 1994, 8:3  
10 p.374. <http://www.rasch.org/rmt/rmt83e.htm>.
- 11 30. Andrich D. Distinctions between assumptions and requirements in measurement in the social  
12 sciences. In J.A. Keats et al. (Eds.), *Mathematical and Theoretical Systems* (pp 7–16), North Holland:  
13 Elsevier Science Publishers BV. 1989.
- 14 31. Salzberger T. Does the Rasch Model Convert an Ordinal Scale into an Interval Scale?  
15  
16 . *Rasch Measurement Transactions*, 2010, 24:2 p 1273-1275 <http://www.rasch.org/rmt/rmt242a.htm>.  
17 2010.
- 18 32. Perline R, Wright B, Wainer H. The Rasch model as additive conjoint measurement. *Applied*  
19 *Psychological Measurement*, 3, 237-255. 1979.
- 20 33. Brodersen J, Meads D, Kreiner S, Thorsen H, Doward L, McKenna S. Methodological aspects of  
21 differential item functioning in the Rasch model. *J Med Econ.* 2007;10:309 – 24.
- 22 34. Marais I, Andrich D. Formalizing dimension and response violations of local independence in the  
23 unidimensional Rasch model. *J Appl Meas.* 2008;9(3):200-15.
- 24 35. Adams RJ, Wilson M, Wang WC. The Multidimensional Random Coefficients Multinomial Logit  
25 Model. *Applied Psychological Measurement*, 21(1), 1-23. 1997.
- 26 36. Nsangi A, Semakula D, Oxman AD, Sewankambo NK. Teaching children in low-income countries  
27 to assess claims about treatment effects: prioritization of key concepts. *Journal of Evidence-Based*  
28 *Medicine.* 2015;8(4):173-80.
- 29 37. Semakula D, Nsangi A, Oxman AD, Sewankambo NK. Priority setting for resources to improve the  
30 understanding of information about claims of treatment effects in the mass media. *Journal of Evidence-*  
31 *Based Medicine.* 2015;8(2):84-90.
- 32 38. Linacre J. Sample size and item calibration stability. *Rasch Measurement Transactions.*  
33 1994;7:328.
- 34 39. Bland JM, Altman DG. Multiple Significance Tests - the Bonferroni Method .10. *British Medical*  
35 *Journal.* 1995;310(6973):170-.
- 36 40. Glass GV, Stanly JC. *Statistical methods in education and psychology*, New Jersey: Prentice-Hall. .  
37 1970.
- 38 41. Linacre J. What do Infit and Outfit, Mean-square and Standardized mean? *Rasch Measurement*  
39 *Transactions.* 2002;16:2 p.878. <http://www.rasch.org/rmt/rmt162f.htm>.
- 40 42. Andrich D, Lou G. Conditional pairwise estimation in the Rasch model for ordered categories  
41 using principal components. *Journal of applied measurement*, 4(3), 205–221. 2003.
- 42 43. Andrich D, Lyne A, Sheridan B, Luo G. RUMM2030: Rasch Unidimensional Measurement Model  
43 software [computer program]. Perth: RUMM Laboratory. 2009.
- 44 44. Wu ML, Adams RJ, Wilson MR, Haldane SA. ACER ConQuest Version 2: Generalised item  
45 response modelling software [computer program]. Camberwell: Australian Council for Educational  
46 Research. 2007.
- 47 45. Bock RD, Aitkin M. Marginal maximum likelihood estimation of item parameters: Application of  
48 an EM algorithm. *Psychometrika*, 46(4), 443-459. . 1981.
- 49
- 50
- 51
- 52
- 53
- 54
- 55
- 56
- 57
- 58
- 59
- 60

- 1  
2  
3 46. Hagell P. Testing Rating Scale Unidimensionality Using the Principal Component Analysis (PCA)/t-  
4 Test Protocol with the Rasch Model: The Primacy of Theory over Statistics. Open Journal of Statistics.  
5 2014  
6  
7 47. Robitzsch A. sirt: Supplementary Item Response Theory Models R package. [http://CRAN.R-pro](http://CRAN.R-project.org/package=sirt)  
8 ject.org/package=sirt. 2013.  
9  
10 48. Rizopoulos D. ltm: An R package for Latent Variable Modelling and Item Response Theory  
11 Analyses. Journal of Statistical Software, 17(5), 1-25 <http://www.jstatsoft.org/v17/i05/>. 2006.  
12  
13 49. Livingston SA ZM. Passing scores; A manual for setting standards of performance on educational  
14 and occupational tests. Educational Testing Service. 1982.  
15  
16 50. Nedelsky L. Absolute grading standards for objective tests. Education and Psychological  
17 Measurement Journal. 1954;14(1):3-19.  
18  
19 51. Angoff WH. 4. Angoff WH. Scales, norms, and equivalent scores. In: Thorndike RL (ed.).  
20 Educational Measurement Washington DC. 1971:514-5.  
21  
22  
23  
24  
25  
26  
27  
28  
29  
30  
31  
32  
33  
34  
35  
36  
37  
38  
39  
40  
41  
42  
43  
44  
45  
46  
47  
48  
49  
50  
51  
52  
53  
54  
55  
56  
57  
58  
59  
60

1  
2  
3  
4  
5 **21.** A review summarized studies comparing playing sports with other  
6 ways of making people happy. The review authors included all studies that  
7 found that sports improve people's happiness. Based on these studies, the  
8 review authors said that sport definitely improves happiness.  
9

10  
11  
12 *Question:* **Do you agree with what the review authors said?**

13  
14  
15 *Options:*

- 16  
17 **A)** It is not possible to say without knowing the opinion of sports experts  
18  
19 **B)** No. The review authors included only those studies with favorable  
20 results  
21  
22 **C)** Yes. The review authors were sure that sports improves happiness  
23  
24 **D)** Yes, the review authors included all of the studies with favorable  
25 results  
26

27  
28  
29  
30 **Answer:**

31  
32  
33  
34 **Figure 1. Example of format**

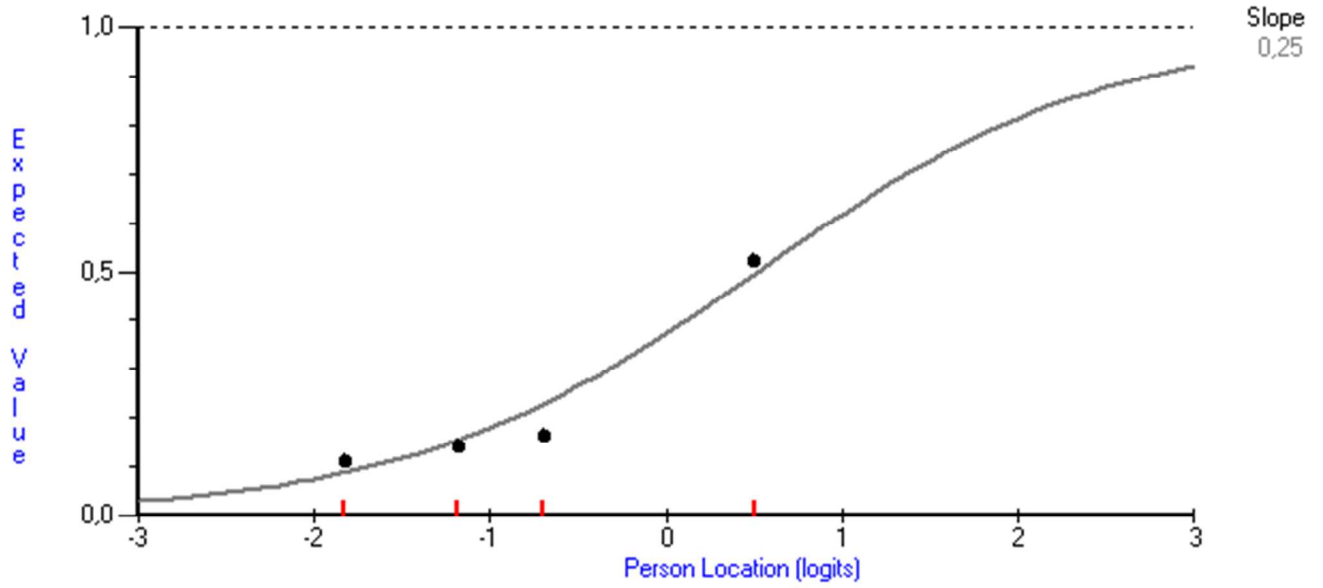

Figure 2. The Item Characteristic Curve

Peer review only

| p    | loc  | SE   | pb   | z-fit | chi-sq | prob |
|------|------|------|------|-------|--------|------|
| 0.25 | 0.52 | 0.16 | 0.46 | -0,10 | 2.10   | 0.55 |

**Table 1.** Difficulty and fit statistics for the item shown in Figure 2 reported as (proportion of correct answers (p), item location parameter or difficulty (loc) estimated standard error (SE) of the item location parameter, item point biserial coefficient (pb), z-fit residual (z-fit), chi-square value (chi-sq) estimated for n=255), chi-square probability



| qn21      | Mean z      | p-value     |
|-----------|-------------|-------------|
| 1         | -0.18       | 0.25        |
| <b>2*</b> | <b>0.82</b> | <b>0.25</b> |
| 3         | -0.47       | 0.33        |
| 4         | 0.02        | 0.16        |
| 9         | -0.50       | 0.02        |
| Total     | 0.00        | 1.00        |

\*indicates correct response

**Table 2. Mean z-scores for the group choosing each response alternative**

| Set | n   | Cronbach's alpha | Response dependence                 | DIF Age | DIF Group (Not in IHC pilots) | DIF Country |
|-----|-----|------------------|-------------------------------------|---------|-------------------------------|-------------|
| 1   | 255 | 0.81             | One pair of items (weak dependence) | 0 items | 1 item                        | 6 items     |
| 2   | 287 | 0.78             | Not observed                        | 2 items | 2 items                       | NR          |
| 3   | 289 | 0.78             | Not observed                        | 2 items | 2 items                       | NR          |
| 4   | 283 | 0.63             | Not observed                        | 2 items | 1 item                        | NR          |

**Table 3. Reliability, response dependency and DIF by item set**

1  
2  
3  
4  
5  
6  
7  
8  
9  
10  
11  
12  
13  
14  
15  
16  
17  
18  
19  
20  
21  
22  
23  
24  
25  
26  
27  
28  
29  
30  
31  
32  
33  
34  
35  
36  
37  
38  
39  
40  
41  
42  
43  
44  
45  
46  
47  
48  
49  
50  
51  
52  
53  
54  
55  
56  
57  
58  
59  
60

**1.** A doctor did a study to find out if drinking tea keeps people from getting sick. The doctor tossed a coin to decide who should get the tea and who should not. People who got tea went to the doctor's office every day to drink their tea. At the end of the study, people who got the tea were less likely to be sick than those who got no tea.

*Based on the text above, please answer the following questions:*

**1.1 Who went to the doctor's office every day?**

*Options:*

- A) People who did not get tea
- B) People who got tea
- C) Everyone
- D) People who got sick

**Answer:**

**1.2. How did the doctor decide who should get tea?**

*Options:*

- A) By tossing a coin
- B) By asking people what they would like
- C) They gave tea to those who were more likely to be sick
- D) They asked people who came to their office

**Answer:**

**1.3. What was the treatment?**

*Options:*

- A) Tea
- B) Sleep
- C) The study
- D) The doctors

**Answer:**

**1.4. What was the result of the study?**

*Options:*

- A) Drinking tea can help people from getting sick
- B) Doctors should toss coins when doing studies
- C) People should go to the doctor if they are sick
- D) Not drinking tea can help people from getting sick

**Answer:**

# BMJ Open

## Measuring ability to assess claims about treatment effects: A latent trait analysis of items from the "Claim Evaluation Tools" database using Rasch modelling

|                                 |                                                                                                                                                                                                                                                                                                                                                                     |
|---------------------------------|---------------------------------------------------------------------------------------------------------------------------------------------------------------------------------------------------------------------------------------------------------------------------------------------------------------------------------------------------------------------|
| Journal:                        | <i>BMJ Open</i>                                                                                                                                                                                                                                                                                                                                                     |
| Manuscript ID                   | bmjopen-2016-013185.R1                                                                                                                                                                                                                                                                                                                                              |
| Article Type:                   | Research                                                                                                                                                                                                                                                                                                                                                            |
| Date Submitted by the Author:   | 02-Feb-2017                                                                                                                                                                                                                                                                                                                                                         |
| Complete List of Authors:       | Austvoll-Dahlgren, Astrid; Norwegian Institute of Public Health<br>Guttersrud, Øystein; Norwegian Centre for Science Education, University of Oslo<br>Nsangi, Allen; Makerere University College of Health Sciences, School of Medicine<br>Semakula, Daniel; Makerere University College of Health Sciences,<br>Oxman, Andrew; Norwegian Institute of Public Health |
| <b>Primary Subject Heading</b>: | Patient-centred medicine                                                                                                                                                                                                                                                                                                                                            |
| Secondary Subject Heading:      | Research methods, Public health, Health policy                                                                                                                                                                                                                                                                                                                      |
| Keywords:                       | evidence based medicine, health literacy, outcome measurement, multiple-choice, Rasch analysis, patient education                                                                                                                                                                                                                                                   |
|                                 |                                                                                                                                                                                                                                                                                                                                                                     |

SCHOLARONE™  
Manuscripts

1  
2  
3 **Measuring ability to assess claims about treatment effects: A latent trait**  
4 **analysis of items from the “Claim Evaluation Tools” database using Rasch**  
5 **modelling**  
6  
7  
8  
9

10  
11  
12 **Astrid Austvoll-Dahlgren, Øystein Guttersrud, Allen Nsangi, Daniel Semakula, Andrew D. Oxman, The**  
13 **IHC group\***  
14

15  
16 **Iain Chalmers**  
17

18  
19 **Leila Cusack**  
20

21  
22 **Claire Glenton**  
23

24  
25 **Tammy Hoffmann**  
26

27  
28 **Margaret Kaseje**  
29

30  
31 **Simon Lewin**  
32

33  
34 **Leah Atieno Marende**  
35

36  
37 **Michael Mugisha**  
38

39  
40 **Laetitia Nyirazinyoye**  
41

42  
43 **Kjetil Olsen**  
44

45  
46 **Matthew Oxman**  
47

48  
49 **Sarah Rosenbaum**  
50

51  
52 **Nelson K. Sewankambo**  
53

54  
55 **Anne Marie Uwitonze**  
56

57 [Astrid Austvoll-Dahlgren \(corresponding author\)](#)  
58

59 [astrid.austvoll-dahlgren@fhi.no](mailto:astrid.austvoll-dahlgren@fhi.no)  
60

1  
2  
3 +47 41294057  
4

5 Norwegian Institute of Public Health

6 BOKS 7004 St.Olavsplass

7  
8 0130 Oslo, Norway  
9

10  
11 Øystein Guttersrud

12 oystein.guttersrud@naturfagsenteret.no

13  
14 Norwegian Centre for Science Education, University of Oslo

15  
16 Postboks 1106, Blindern 0317 Oslo, Norway  
17  
18  
19

20  
21 Allen Nsangi

22 nsallen2000@yahoo.com

23  
24 Makerere University College of Health Sciences.

25  
26 New Mulago Hospital Complex, Administration Building, Second Floor.

27  
28 P.O.Box 7072, Kampala Uganda  
29  
30

31 Daniel Semakula

32 semakuladaniel@gmail.com

33  
34 Makerere University College of Health Sciences.

35  
36 New Mulago Hospital Complex, Administration Building, Second Floor.

37  
38 P.O.Box 7072, Kampala Uganda  
39  
40

41 Andrew D. Oxman

42 oxman@online.no

43  
44 Norwegian Institute of Public Health

45 BOKS 7004 St.Olavsplass

46  
47 0130 Oslo, Norway  
48  
49  
50

51  
52  
53  
54 **Keywords: evidence based medicine, shared decision making, health literacy, outcome measurement,**  
55 **multiple-choice, patient education, Rasch analysis**  
56

## Abstract

**Background:** The Claim Evaluation Tools database contains multiple-choice items for measuring people's ability to apply the key concepts they need to know to be able to assess treatment claims. We assessed items from the database using Rasch analysis to develop an outcome measure to be used in two randomised trials in Uganda. Rasch analysis is a form of psychometric testing relying on Item Response Theory. It is a dynamic way of developing outcome measures that are valid and reliable.

**Objectives:** To assess the validity, reliability, and responsiveness of 88 items addressing 22 key concepts using Rasch analysis.

**Participants:** We administered four sets of multiple-choice items in English to 1114 people in Uganda and Norway, of which 685 were children and 429 were adults (including 171 health professionals). We scored all items dichotomously. We explored summary and individual fit statistics using the RUMM2030 analysis package. We used SPSS to perform distractor analysis.

**Results:** Most items conformed well to the Rasch model but some items showed evidence of differential item functioning or needed revision. Overall, the four item sets had satisfactory reliability. We did not identify significant response dependence between any pairs of items and, overall, the magnitude of multidimensionality in the data was acceptable. The items had a high level of difficulty.

**Conclusion:** We found that most items that we tested had satisfactory fit to the Rasch model. Following revision of some items, informed by the findings from this study, we concluded that most of the items were suitable for use in an outcome measure for evaluating the ability of children or adults to assess treatment claims.



## Strengths and limitations of this study

- To our knowledge, this is the first Rasch analysis of multiple-choice items that measure people's ability to assess claims about treatment effects.
- We have used robust methods to evaluate the items' validity and reliability in two settings, allowing for evidence informed revisions.
- Our analysis suggests that most items have acceptable model fit and can be used in the settings where they were tested.
- The items might function differently when translated or used in other settings.

For peer review only

## Background

People are confronted with claims about treatment effects daily. This includes claims about the effects of changes in health behaviour, screening, other preventive interventions, therapeutic interventions, rehabilitation, and public health and health system interventions that are targeted at groups of people. A “treatment claim” is something someone says about whether a treatment causes something to happen or to change; for example, that Vitamin C prevents you from getting the common cold. A claim can be true or can be false (1-4). Many of these claims are not based on evidence from fair comparisons of treatments, and many patients and health professionals alike do not have the necessary skills to assess the reliability of these claims (5-11). Being able to think critically and make informed decisions is essential for engaging patients in clinical decisions and citizens in policy decisions (10, 12-14).

Interest in promoting critical thinking cuts across disciplines (15). There are many definitions and conceptualisations of critical thinking. In the learning sciences, critical thinking is defined as “purposeful, self-regulatory judgment that results in interpretation, analysis, evaluation, and inference, as well as explanations of the considerations on which that judgment is based” (16). There is debate about the extent to which critical thinking skills are “generic” and the extent to which they are content specific. Critical thinking is also a component of health literacy (17). In health literacy studies, critical thinking is content specific, focussing on people’s ability to think critically about health information. However, definitions of this component of health literacy are often fuzzy. They seldom describe which criteria patients should apply when thinking critically about health information (15). Critical thinking is also a key component of evidence-based practice. As in health literacy studies, critical thinking in evidence-based practice is content specific, but is operationalised as practical skills such as the ability to formulate questions, find relevant research, and assess the certainty of research evidence using explicit criteria (15, 18, 19).

Efforts to promote critical thinking as a component of evidence-based practice have largely focussed on health professionals. However, interest in helping patients and the public to make evidence-informed decisions is growing (11). One such initiative is the [Informed Healthcare Choices](#) (IHC) project, which aims to help people to assess treatment claims and make informed health choices. The project has developed primary school resources and a podcast series to improve the ability of children and their

1  
2  
3 parents to assess claims about treatment effects. We have piloted these resources in Uganda, Kenya,  
4  
5 Rwanda, and Norway. We will test the effects of the resources in randomized trials in Uganda (20, 21).  
6  
7

#### 8 *The Claim Evaluation Tools database*

9

10 The first step in the IHC project was to identify the Key Concepts people need to know to be able to  
11 assess treatment effects (22). This resulted in an initial list of 32 Key Concepts that serves as a syllabus  
12 for designing learning resources (22). This was also the starting point for the IHC learning resources. We  
13 present a short list of the Key Concepts in table 1. This list is hosted by testingtreatments.org, and is an  
14 evolving document subject to annual revisions.  
15  
16  
17  
18

19 Looking for suitable measurement tools to be used in the IHC trials, we conducted a systematic mapping  
20 review of interventions and assessment tools addressing the Key Concepts (15). Based on the findings of  
21 this review, we concluded that this research is heterogeneous and that outcomes are measured  
22 inconsistently (15). Furthermore, we found no instrument that addressed all the Key Concepts, or that  
23 would be suitable as an outcome measure in trials of the IHC learning resources. We therefore  
24 developed a database of multiple-choice items that could be used outcome measures in the two IHC  
25 trials in Uganda, as well for other purposes. The Claim Evaluation Tools database includes four or more  
26 items that address each of the Key Concepts. We developed these items in four steps, using qualitative  
27 and quantitative methods, over a three year period (2013-2016) (23):  
28  
29  
30  
31  
32  
33  
34

- 35 (i) Determination of the scope of the database, writing and revising items;
- 36 (ii) Expert item review and feedback (face validity);
- 37 (iii) Cognitive interviews with end-users - including children, parents, teachers and patient  
38 representatives - to assess relevance, understanding and acceptability; and
- 39 (iv) Piloting and practical administrative tests of the items in different contexts.  
40  
41  
42  
43  
44

45 Instead of a standard, fixed questionnaire, we wanted to create a database from which teachers and  
46 researchers can choose items relevant to their purposes and target groups, and design their own tests  
47 or questionnaires (23). We developed all items in English, but translations are now also available in  
48 Luganda (Uganda), Norwegian, German, Spanish (Mexico), and Chinese. Currently, the database includes  
49 approximately 190 items. The items are designed to be relevant across different contexts, and can be  
50 used for children (from ages 10 and up) and adults (including both patients and health professionals)  
51 (23). We use “one-best answer” response options in all items, with one answer being unambiguously  
52  
53  
54  
55  
56  
57  
58  
59  
60

the “best” and the remaining options “worse” (see figure 1 for an example of a multiple-choice item) (24).

We describe the development of the items in more detail elsewhere (23). We describe here the first psychometric testing, using Rasch analysis, of items from the Claim Evaluation Tools database. The items were selected for use in an outcome measure for trials of the IHC primary school resources and podcast. The purpose of the Rasch analysis is to ensure the validity and reliability of the outcome measure (25).

Table 1. Key Concepts that people need to understand to assess claims about treatment effects

| <b>Informed Health Choices Concepts</b>                                                                                                                                          |
|----------------------------------------------------------------------------------------------------------------------------------------------------------------------------------|
| <b>1. Recognising the need for fair comparisons of treatments</b><br><i>[Fair treatment comparisons are needed]</i>                                                              |
| 1.1 Treatments may be harmful<br><i>[Treatments can harm]</i>                                                                                                                    |
| 1.2 Personal experiences or anecdotes (stories) are an unreliable basis for determining the effects of most treatments<br><i>[Anecdotes are not reliable evidence]</i>           |
| 1.3 A treatment outcome may be associated with a treatment, but not caused by the treatment<br><i>[Association is not necessarily causation]</i>                                 |
| 1.4 Widely used or traditional treatments are not necessarily beneficial or safe<br><i>[Practice is often not based on evidence]</i>                                             |
| 1.5 New, brand-named, or more expensive treatments may not be better than available alternatives<br><i>[New treatments are not always better]</i>                                |
| 1.6 Opinions of experts or authorities do not alone provide a reliable basis for deciding on the benefits and harms of treatments<br><i>[Expert opinion is not always right]</i> |
| 1.7 Conflicting interests may result in misleading claims about the effects of treatments<br><i>[Be aware of conflicts of interest]</i>                                          |
| 1.8 Increasing the amount of a treatment does not necessarily increase the benefits of a treatment and may cause harm<br><i>[More is not necessarily better]</i>                 |

|    |                                                                                                                                     |
|----|-------------------------------------------------------------------------------------------------------------------------------------|
| 1  |                                                                                                                                     |
| 2  |                                                                                                                                     |
| 3  |                                                                                                                                     |
| 4  | 1.9 Earlier detection of disease is not necessarily better                                                                          |
| 5  | <i>[Earlier is not necessarily better]</i>                                                                                          |
| 6  |                                                                                                                                     |
| 7  | 1.10 Hope can lead to unrealistic expectations about the effects of treatments                                                      |
| 8  | <i>[Avoid unrealistic expectations]</i>                                                                                             |
| 9  |                                                                                                                                     |
| 10 |                                                                                                                                     |
| 11 | 1.11 Beliefs about how treatments work are not reliable predictors of the actual effects of treatments                              |
| 12 | <i>[Theories about treatment can be wrong]</i>                                                                                      |
| 13 |                                                                                                                                     |
| 14 | 1.12 Large, dramatic effects of treatments are rare                                                                                 |
| 15 | <i>[Dramatic treatment effects are rare]</i>                                                                                        |
| 16 |                                                                                                                                     |
| 17 |                                                                                                                                     |
| 18 |                                                                                                                                     |
| 19 |                                                                                                                                     |
| 20 |                                                                                                                                     |
| 21 | 2. Judging whether a comparison of treatments is a fair comparison                                                                  |
| 22 | <i>[Treatment comparisons should be fair]</i>                                                                                       |
| 23 |                                                                                                                                     |
| 24 | 2.1 Evaluating the effects of treatments requires appropriate comparisons                                                           |
| 25 | <i>[Treatment comparisons are necessary]</i>                                                                                        |
| 26 |                                                                                                                                     |
| 27 |                                                                                                                                     |
| 28 | 2.2 Apart from the treatments being compared, the comparison groups need to be similar (i.e. 'like needs to be compared with like') |
| 29 | <i>[Compare like with like]</i>                                                                                                     |
| 30 |                                                                                                                                     |
| 31 |                                                                                                                                     |
| 32 | 2.3 People's experiences should be counted in the group to which they were allocated                                                |
| 33 | <i>[Base analyses on allocated treatment]</i>                                                                                       |
| 34 |                                                                                                                                     |
| 35 |                                                                                                                                     |
| 36 | 2.4 People in the groups being compared need to be cared for similarly (apart from the treatments being compared)                   |
| 37 | <i>[Treat comparison groups similarly]</i>                                                                                          |
| 38 |                                                                                                                                     |
| 39 |                                                                                                                                     |
| 40 | 2.5 If possible, people should not know which of the treatments being compared they are receiving                                   |
| 41 | <i>[Blind participants to their treatments]</i>                                                                                     |
| 42 |                                                                                                                                     |
| 43 |                                                                                                                                     |
| 44 | 2.6 Outcomes should be measured in the same way (fairly) in the treatment groups being compared                                     |
| 45 | <i>[Assess outcome measures fairly]</i>                                                                                             |
| 46 |                                                                                                                                     |
| 47 |                                                                                                                                     |
| 48 | 2.7 It is important to measure outcomes in everyone who was included in the treatment comparison groups                             |
| 49 | <i>[Follow up everyone included]</i>                                                                                                |
| 50 |                                                                                                                                     |
| 51 |                                                                                                                                     |
| 52 |                                                                                                                                     |
| 53 | <b>3. Understanding the role of chance</b>                                                                                          |
| 54 | <i>[Understand the role of chance]</i>                                                                                              |
| 55 |                                                                                                                                     |
| 56 |                                                                                                                                     |
| 57 |                                                                                                                                     |
| 58 |                                                                                                                                     |
| 59 |                                                                                                                                     |
| 60 |                                                                                                                                     |

1  
2  
3  
4  
5  
6  
7  
8  
9  
10  
11  
12  
13  
14  
15  
16  
17  
18  
19  
20  
21  
22  
23  
24  
25  
26  
27  
28  
29  
30  
31  
32  
33  
34  
35  
36  
37  
38  
39  
40  
41  
42  
43  
44  
45  
46  
47  
48  
49  
50  
51  
52  
53  
54  
55  
56  
57  
58  
59  
60

|                                                                                                                                                                                                                               |
|-------------------------------------------------------------------------------------------------------------------------------------------------------------------------------------------------------------------------------|
| <p>3.1 Small studies in which few outcome events occur are usually not informative and the results may be misleading<br/><i>[Small studies may be misleading]</i></p>                                                         |
| <p>3.2 The use of p-values to indicate the probability of something having occurred by chance may be misleading; confidence intervals are more informative<br/><i>[P-values alone can be misleading]</i></p>                  |
| <p>3.3 Saying that a difference is statistically significant or that it is not statistically significant can be misleading<br/><i>['Significance' may be misleading]</i></p>                                                  |
| <p><b>4. Considering all of the relevant fair comparisons</b><br/><i>[Consider all the relevant evidence]</i></p>                                                                                                             |
| <p>4.1 The results of single tests of treatments can be misleading<br/><i>[Single studies can be misleading]</i></p>                                                                                                          |
| <p>4.2 Reviews of treatment tests that do not use systematic methods can be misleading<br/><i>[Unsystematic reviews can mislead]</i></p>                                                                                      |
| <p>4.3 Well done systematic reviews often reveal a lack of relevant evidence, but they provide the best basis for making judgements about the certainty of the evidence<br/><i>[Consider how certain the evidence is]</i></p> |
| <p><b>5. Understanding the results of fair comparisons of treatments</b><br/><i>[Understand the results of comparisons]</i></p>                                                                                               |
| <p>5.1 Treatments may have beneficial and harmful effects<br/><i>[Weigh benefits and harms of treatment]</i></p>                                                                                                              |
| <p>5.2 Relative effects of treatments alone can be misleading<br/><i>[Relative effects can be misleading]</i></p>                                                                                                             |
| <p>5.3 Average differences between treatments can be misleading<br/><i>[Average differences can be misleading]</i></p>                                                                                                        |
| <p><b>6. Judging whether fair comparisons of treatments are relevant</b><br/><i>[Judge relevance of fair comparisons]</i></p>                                                                                                 |

|                                                                                                                                                      |
|------------------------------------------------------------------------------------------------------------------------------------------------------|
| 6.1 Fair comparisons of treatments should measure outcomes that are important<br><i>[Outcomes studied may not be relevant]</i>                       |
| 6.2 Fair comparisons of treatments in animals or highly selected groups of people may not be relevant<br><i>[People studied may not be relevant]</i> |
| 6.3 The treatments evaluated in fair comparisons may not be relevant or applicable<br><i>[Treatments used may not be relevant]</i>                   |
| 6.4 Results for a selected group of people within fair comparisons can be misleading<br><i>[Beware of subgroup analyses]</i>                         |

Please enter figure 1. Example of a multiple choice-item taken from the Claim Evaluation Tools database

## Objective

To assess the validity, reliability, and responsiveness of multiple-choice items from the Claim Evaluation Tools database, using Rasch analysis, in English speaking populations in Uganda and Norway.

## Methods

### Scope and setting

Most of the data collection took place in Uganda. The reason for this was that we intended to use the items from the Claim Evaluation Tools database as the primary outcome measure for the IHC trials there. The items in the Claim Evaluation tools database are expected to work in the same way for children and adults (23). Consequently, for this evaluation, we needed a sample including both children and adults to explore item bias (differential item functioning) associated with age. We also needed a mix of people with and without relevant training. For these purposes, we invited children (in year-5 of primary school, with a starting age of 10 years) and adults who had participated in piloting of the IHC resources. We also recruited children, parents and other adults (without training) through our networks in Uganda established at the start of the IHC project (26, 27).

We also included a group of children who had participated in a pilot of the IHC primary school resources at an international school in Norway. Although this was a small sample, it provided an indication of the

1  
2  
3 fit to the Rasch model in an international population, and provide information on difficulty and  
4 differential item functioning in the two different settings.  
5  
6  
7  
8  
9

### 10 **Test administration and sample size**

11  
12 We evaluated 88 items addressing the 22 Key Concepts initially targeted by two IHC interventions (26,  
13 27). Having multiple items for each concept allows us to delete items with poor fit to the Rasch model.  
14 In addition, Rasch analysis provides information on each item's difficulty. Having a range of items with  
15 different difficulties addressing each Key Concept can be useful for measurement purposes, for example  
16 when used in Computer Adaptive Testing.  
17  
18  
19  
20

21  
22 There is no consensus on the sample size needed to perform a Rasch analysis (28). This is a pragmatic  
23 judgement that takes account of the number of items evaluated and the statistical power needed to  
24 identify item bias resulting from relevant background factors. Since we intended to test many items, we  
25 did not consider it feasible to include these in a single test, and split the items into four sets or "tests".  
26 We aimed to include approximately 250 respondents in Uganda for each of the four tests.  
27  
28  
29  
30

31  
32 The children in Norway only responded to one set (out of the four). In both settings, we administered  
33 the items in English, since this was the official school language in both the Norwegian international  
34 school and the Ugandan schools. The data collection took place in 2015.  
35  
36  
37

38 In developing the Claim Evaluation Tools database, low literacy skills were identified as a potential  
39 barrier in the Ugandan setting (23). Consequently, we developed four items to evaluate the respondents'  
40 text recognition and understanding as an indication of their reading ability (see Appendix 1). We  
41 designed the items to resemble the multiple-choice items addressing the Key Concepts. The first two  
42 items required the respondents to identify the correct text in the scenario. The latter two items  
43 assessed whether the respondent understood the information in the scenario.  
44  
45  
46  
47  
48  
49  
50

### 51 **Rasch analysis**

52  
53  
54 Rasch analysis is used to check the degree to which scoring and summing-up across items is defensible  
55 in the data collected (29, 30). It is a unified approach to address important measurement issues required  
56  
57  
58  
59  
60



1  
2  
3 for validating an outcome measure such as a scale or a test, including testing for; internal construct  
4 validity (by testing for multidimensionality), invariance of the items (item-person-interaction), and item  
5 bias (differential item function)(30).  
6  
7

8  
9 Rasch analysis has been used successfully in many disciplines including health research, and can be  
10 applied to both dichotomous and polytomous data (30-32). Rasch analysis also provides an excellent  
11 basis for developing and revising items, and in construction of item banks. Misfit to the Rasch model  
12 might be diagnosed and items can be deleted or revised to improve model fit (33). In this way, Rasch  
13 analysis represents a dynamic approach to achieving construct validity, in which revisions are informed  
14 by the evidence (33). For this analysis, we scored all items dichotomously. We used Excel for data entry,  
15 RUMM2030 for Rasch analysis and SPSS for a simple classical test theory approach to distractor analysis.  
16 We report the steps we took in our analysis below following the fundamental aspects of Rasch analysis  
17 (30).  
18  
19  
20  
21  
22  
23  
24  
25  
26  
27

### 28 **Summary statistics and overall fit**

29  
30  
31 In Rasch analysis, the response patterns to an item set are tested against what is expected by the model,  
32 i.e. the ratio between any two items should be constant across different ability groups (30). For this  
33 study, ability refers to the “ability to critically assess claims about treatment effects” In other words, the  
34 easier the item is, the more likely it will be answered correctly; and the more able the person is, the  
35 more likely he or she will answer correctly (34). We explored this relationship between the expected and  
36 observed data using the summary statistics function in RUMM2030.  
37  
38  
39  
40  
41

42 The overall Item-Person Interaction is presented on a logit scale, where the mean item location is always  
43 given as a zero. The mean person location is relative to the mean item location, and a mean person  
44 location higher than and a mean person location higher or lower than “0” indicates that the test, on  
45 average, is “too easy” or “too hard”, respectively.  
46  
47  
48

49 From this analysis, we also report the item and person Fit Residual Statistics; this assesses the degree of  
50 divergence (or residual) between the expected and observed data for each person item when summed  
51 for all items and all persons respectively. In RUMM2030 this is reported as an approximate z-score,  
52  
53  
54  
55  
56  
57

1  
2  
3 representing a standardized normal distribution (35). Ideally, item fit and person fit should have a mean  
4 of zero and a SD of one (30).  
5  
6

7  
8 The Item-Trait- Interaction is an overall test of invariance to the set of items, and the extent to which  
9 the items are working as expected at the grouped ability levels (36). This is represented as a Chi-Square  
10 probability value. Ideally, this should be greater than 0.05, indicating that there is no “statistically  
11 significant” deviation between the observed and “expected” data.  
12  
13

### 14 15 16 17 18 **Power of test of fit and reliability**

19  
20 The Person-Separation Index is an indicator of the power of a set of items to discriminate between  
21 ability groups (35). We considered a Person-Separation-Index greater than 0.7 to be acceptable (35). We  
22 also calculated Cronbach’s Alpha as a measure of the reliability of each set of items. We considered a  
23 value of 0.7 or higher to be adequate for this. Cronbach’s Alpha is only available if there are no missing  
24 data. We solved this by calculating missing responses as “incorrect” responses (35).  
25  
26  
27  
28  
29  
30  
31

### 32 **Individual person and item fit**

33  
34  
35 We investigated individual person fit. Misfit violates the principles of the Guttman structure and may  
36 indicate different types of error, such as guessing.  
37  
38

39  
40 The Item Characteristic Curve indicates the Rasch model’s theoretically expected probability of  
41 answering correctly as a function of ability on the latent trait scale (see Figure 2 for an example of an  
42 Item Characteristic Curve). We inspected Item Characteristic Curves and used chi-square values as single  
43 item fit indices using a  $p = 5\%$  as our significance level. Using Bonferroni adjustment, the significance  
44 level was adjusted ( $p = 0.05/k$ ) according to the number of  $k$  significance tests carried out (one for each  
45 item).  
46  
47  
48  
49

50  
51 We also performed distractor analysis using SPSS. The latter is particularly useful in developing and  
52 revising multiple-choice items, because it may identify response options (distractors) that are not  
53 working as intended and can subsequently be deleted or revised.  
54  
55  
56  
57

1  
2  
3  
4  
5  
6 Please insert figure 2. The Item Characteristic Curve  
7  
8  
9  
10

11 The curve in figure 2 represents the expected probability of answering correctly, and the dots represent  
12 the observed proportion of correct answers for some intervals of ability estimates (class intervals).

13 When the observed proportions fit the curve, the data fit the Rasch model. Items with sub-optimal fit  
14 indicate measurement error (35).  
15  
16  
17

18 When two groups of people (for example children and adults) respond differently to an item despite  
19 equal ability levels, that item displays “within item bias” or differential item functioning (DIF) and  
20 invariance is violated (37). We explored DIF using ANOVA in RUMM2030. There are two types of DIF.  
21 Uniform DIF is when one group of people perform consistently better on an item; for example, when an  
22 item is easier for all adults across all ability groups compared to children. This is less problematic than  
23 non-uniform DIF, where the differences between the groups vary across levels of the attribute (30).  
24  
25  
26  
27  
28  
29  
30  
31  
32

### 33 **Testing for multidimensionality and response dependency**

34  
35 Unidimensionality - having just one trait underlying respondents’ responses - is a fundamental  
36 requirement of measurement and is explored using Rasch analysis (34). Furthermore, there should be  
37 no response dependency in the data; i.e. people’s responses to an item should not have a bearing on  
38 their responses to other items (38). Response dependence results in redundancy in the data and  
39 inefficient measures.  
40  
41  
42  
43

44 We explored possible dimension violations of local independence applying the PCA/t-test procedure  
45 computing paired t-tests using two sub-sets of items from each item set. The hypothesis of a  
46 unidimensional scale is weakened when the proportion of individuals with statistically significant  
47 differences in ability estimates on a pair of subscales exceeds 5% (39). We also inspected the residual  
48 correlation matrix estimated in RUMM2030 (40). We considered residual correlations above 0.3 as  
49 indicators of response dependence between items (41).  
50  
51  
52  
53  
54  
55  
56  
57  
58  
59  
60

## Results

### Description of sample

The total sample included 1114 people, among whom 685 were children and 429 were adults (including 171 health professionals). Of these 1114 people, 329 had received some form of training related to the Key Concepts. The Norwegian sample equalled 5% (59 respondents) out of the total respondents. The mean number of missing and incorrectly filled in responses was <1% per item set. Less than 1/3 responded correctly to all four reading test questions in the Ugandan sample, indicating a low literacy level in English.

### Summary statistics and overall fit

Overall, the items were difficult with no very easy items and no extremely difficult items (see figure 2 for the Item Threshold distributions per set). The mean person locations per set were -0.81, -1.06, -1.15 and -1.15 logits, respectively. Fit Statistics are presented in table 2. Mean item fit residuals and person fit residuals were satisfactory and close to 0, although the standard errors for set 1 and 2 is somewhat higher than what we would like to see. The Item-Person maps for all sets are available in figures 3 to 6. The upper part of the Item-Person map represents respondents' ability levels; the lower part show the distribution of item locations. From this we can see that overall the items are difficult, suggesting that items with lower difficulties might be needed to make these tests more sensitive (able to discriminate between people at the lower end of the scale (those with lower ability) (35). The item-Trait interaction had a Chi square probability of 0.00 for all sets, indicating that not all items may work as expected.

The estimated reliability indices were also acceptable (Cronbach's Alpha > 0.70 for all sets with exception of set 4 where the value was 0.63). Similarly, the Person-Separation Indexes were satisfactory for all sets with the exception of set 4 which had a value of 0.54.

Table 2. Overall fit statistics and tests of local independence by set

| Item set           | 1 | 2 | 3 | 4 |
|--------------------|---|---|---|---|
| Summary statistics |   |   |   |   |

|                                                              |              |              |              |              |
|--------------------------------------------------------------|--------------|--------------|--------------|--------------|
| Persons (n)                                                  | 255          | 287          | 289          | 283          |
| Mean item fit residual (sd)                                  | 0.02 (1.83)  | -0.03 (1.52) | -0.14 (1.11) | -0.08 (1.38) |
| Mean person location (sd)                                    | -0.81 (1.00) | -1.06 (0.97) | -1.15 (0.96) | -1.15 (0.75) |
| Overall chi-square value (df)                                | 177.6 (75)   | 194.3 (96)   | 189.5(96)    | 170.7 (72)   |
| Chi-square probability                                       | 0.00         | 0.00         | 0.00         | 0.00         |
| Person Separation Index                                      | 0.75         | 0.70         | 0.69         | 0.54         |
| Cronbach's Alpha                                             | 0.81         | 0.78         | 0.78         | 0.63         |
| Items with misfit (n)                                        | 2            | 1            | 1            | 1            |
| Persons with misfit (n)                                      | 0            | 2            | 1            | 3            |
| <b>Tests for multidimensionality and response dependency</b> |              |              |              |              |
| Proportion of significant paired t-tests (%)                 | 3.5          | 2.8          | 2.8          | 5.7          |
| Dependent pairs of items (n)                                 | 0            | 0            | 0            | 0            |

Please enter figure 3. Item Person map for item set 1

Please enter figure 4. Item Person map for item set 2.

Please enter figure 5. Item Person map for item set 3

Please enter figure 6. Item Person map for item set 4

### Individual person and item fit

We identified few persons with misfit. Likewise, we identified only two items with potential misfit in set 1, and one item in the remaining three sets (see table 2).

Overall, most items fit well to the Rach model. However, out of the 88 items, seventeen items were found to have poor model fit. The findings resulting from the distractor analyses, also suggested that many of the items would be improved by deleting or revising response options.

1  
2  
3 In set 1 (the only set applied in both Uganda and Norway), five items displayed uniform DIF and one  
4 item displayed non-uniform DIF associated with setting (i.e., Norway and Uganda). Across the four sets,  
5 six items displayed uniform DIF associated with age.  
6  
7  
8  
9

### 10 **Multidimensionality and response dependency**

11 We did not observe any statistically significant residual correlation between pairs of items, and the  
12 paired *t*-test procedure indicated that the sets were sufficiently unidimensional (Table 2).  
13  
14  
15  
16

### 17 **Discussion**

18 We have developed the Claim Evaluation Tools database using qualitative and quantitative feedback  
19 from methodologists and end-users in six countries (23). This study reports the findings of the first  
20 psychometric testing of multiple-choice items from the database, using Rasch analysis conducted in two  
21 settings, Uganda and Norway.  
22  
23  
24  
25  
26  
27  
28

29 Most of the 88 items (addressing 22 Key Concepts) conformed well to the Rasch model. However some  
30 items displayed DIF by setting and age, and some items required revisions. Overall, we found that the  
31 four item sets created from the Claim Evaluation Tools database had acceptable reliability. We did not  
32 identify significant response dependence between any pairs of items and, overall, the magnitude of  
33 multidimensionality in the data was acceptable.  
34  
35  
36  
37  
38

39 Feedback on the items from experts and end-users suggested that the items were difficult (23). The  
40 Rasch analyses confirmed this. Moreover, the respondents reading skills were found to be low in the  
41 target population in Uganda. This suggests that efforts should be made to simplify the text in the  
42 scenarios and editing the response options to improve readability and improve validity. Reducing the  
43 number of response options in the items could also contribute to making the items less difficult.  
44  
45  
46  
47  
48

49 Based on the findings from our analyses, we decided to remove items with non-uniform DIF from the  
50 Claim Evaluation Database. We also decided to revise items with poor model fit and reduce response  
51 options that did not work as expected. Revised items will be retested in the Ugandan context, where  
52 they will be used as an outcome measure.  
53  
54  
55  
56  
57

1  
2  
3  
4  
5 A limitation of this study is that we tested the items in only two settings, Uganda and Norway, and that  
6 the fit to the Rasch model in other settings is unknown. Further testing of items from the Claim  
7 Evaluation Tools database using Rasch Analysis in other countries and languages is needed. We also did  
8 not include the respondents' gender in the analysis, which could introduce further DIF. This will be  
9 explored in further testing.  
10  
11  
12

13  
14  
15 There has been an encouraging interest in the Claim Evaluation Tools database in settings other than the  
16 countries included in the IHC project, and researchers in Norway, Mexico, Germany and China are  
17 currently translating and testing the multiple-choice items in their settings. In addition, the items  
18 addressing the Key Concepts we judged to be more advanced, and which were not tested as part of this  
19 study, are currently being tested online through [www.testingtreatments.org](http://www.testingtreatments.org), targeting people with  
20 relevant training, such as health researchers or teachers of evidence-based medicine. We are also  
21 developing items to assess intended behaviours and attitudes towards assessing treatment claims. The  
22 Claim Evaluation Tools database, which includes all of these questions, as well as findings from  
23 evaluations such as this one, is freely available for non-commercial use on request through the Testing  
24 Treatments interactive website ([www.testingtreatments.org](http://www.testingtreatments.org)).  
25  
26  
27  
28  
29  
30  
31  
32  
33

34 When used for evaluating peoples' ability to assess treatment claims, an item set generated from the  
35 Claim Evaluation Tools database can be scored by calculating the number or percentage of correct  
36 responses. However, such scores can be difficult to interpret, especially when comparing the average  
37 score of two groups (e.g. in a randomised trial). An absolute (criterion referenced) standard for a passing  
38 score (i.e. a cut-off for passing) or for mastery of the Key Concepts that are tested. Setting a cut-off  
39 requires judgement, and there are several ways of doing this (42-44). For the items that will be used in  
40 the trials of the IHC primary school resources and podcast, we have established criteria referenced  
41 standards using a combination of Nedelsky's and Angoff's methods (42-45).  
42  
43  
44  
45  
46  
47  
48  
49

## 50 Conclusion

51  
52 We found that most items that we tested had satisfactory fit to the Rasch model. Taken together with  
53 our previously reported findings, the findings of this study suggest that the items have face and  
54 construct validity in the settings in which they have been tested. Following revisions of some items,  
55  
56  
57  
58  
59  
60

1  
2  
3 informed by the findings from this study, most of the items that we tested are suitable for use in an  
4  
5 outcome measure that evaluates people's ability to apply the key concepts they need to know to be able  
6  
7 to assess treatment claims.  
8  
9

### 10 11 12 **Authors' contributions**

13  
14  
15 AA, ØG, AO wrote the protocol and the IHC group provided comments to this protocol. The Claim  
16  
17 Evaluation Tools database was developed by the IHC group. AA coordinated all of the development and  
18  
19 evaluation process with support from AO. DS, AN and KO performed the data collection and data entry  
20  
21 from the field-testing. ØG and AA prepared the data files for the analysis, and ØG conducted the Rasch  
22  
23 analyses. AA authored this manuscript with significant input from the IHC group.  
24  
25  
26

### 27 **Acknowledgements**

28  
29  
30 We are deeply grateful to all of the enthusiastic children, parents and teachers that contributed to this  
31  
32 project. We would also like to thank the IHC advisory panel, and the other researchers and  
33  
34 methodologists that provided their advice in the development process.  
35  
36  
37

### 38 **Funding and competing interests**

39  
40 The IHC project is funded by the Research Council of Norway- GLOBVAC project 220603. The authors  
41  
42 declare no conflicting interests.  
43  
44  
45

### 46 **Ethical approval**

47  
48 The research was approved by the Makerere University School of Medicine Research and Ethics  
49  
50 Committee and the Uganda National Council for Science and Technology.  
51  
52

### 53 **Data sharing statement**

54  
55  
56  
57  
58  
59  
60



All data are published as part of this study; additional information is available upon request and on our website [informedhealthchoices.org](http://informedhealthchoices.org). All items in the Claim Evaluation Tools Database are available upon request for non-commercial use.

## References

1. Lewis M, Orrock P, Myers S. Uncritical reverence in CM reporting: Assessing the scientific quality of Australian news media reports. *Health Sociology Review*. 2010;19(1):57-72.
2. Glenton C, Paulsen E, Oxman A. Portals to Wonderland? Health portals lead confusing information about the effects of health care. *BMC Medical Informatics and Decision Making*. 2005;5:7:8.
3. Moynihan R, Bero L, Ross-Degnan D, Henry D, Lee K, Watkins J, et al. Coverage by the news media of the benefits and risks of medications. *The New England Journal of Medicine*. 2000;342(22):1645-50.
4. Wolfe R, Sharp L, Lipsky M. Content and design attributes of antivaccination web sites. *Journal of American Medical Association*. 2002;287(24):3245-48.
5. Woloshin S, Schwartz L, Byram S, Sox H, Fischhoff B, Welch H. Women's understanding of the mammography screening debate. *Archives of Internal Medicine* 2000;160:1434-40.
6. Fox S, Duggan M. Health Online 2013. 09.04.2013. Available from: <http://www.pewinternet.org/Reports/2013/Health-online.aspx>.
7. Robinson E, Kerr C, Stevens A, Lilford R, Braunholtz D, Edwards S, et al. Lay public's understanding of equipoise and randomisation in randomised controlled trials. Research Support, Non-U.S. Gov't. NHS R&D HTA Programme, 2005 Mar. Report No.: 1366-5278 (Linking) Contract No.: 8.
8. Sillence E, Briggs P, Harris PR, Fishwick L. How do patients evaluate and make use of online health information? *Social Science & Medicine*. 2007;64(9):1853-62.
9. Horsley T, Hyde C, Santesso N, Parkes J, Milne R, Stewart R. Teaching critical appraisal skills in healthcare settings. *Cochrane Database of Systematic Reviews*. 2011(11).
10. Evans I, Thornton H, Chalmers I, P. G. Testing Treatments: better research for better healthcare. Second edition. London: Pinter & Martin Ltd 2011. Available from: Available online at [www.testingtreatments.org/new-edition/](http://www.testingtreatments.org/new-edition/).
11. Chalmers I, Glasziou P., Badenoch D., Atkinson P., Austvoll-Dahlgren A., Oxman A. Evidence Live 2016: Promoting informed healthcare choices by helping people assess treatment claims. *BMJ*; 26.06.2016.
12. Taking shared decision making more seriously. *Lancet*. 2011;377(9768):784.
13. Stacey D, Légaré F, Col NF, Bennett CL, Barry MJ, Eden KB, et al. Decision aids for people facing health treatment or screening decisions. *Cochrane Database of Systematic Reviews* 2014, Issue 1 Art No: CD001431 DOI: 10.1002/14651858CD001431pub4.
14. Berkman N, Sheridan S, Donahue K, Halpern D, Crotty K. Low Health Literacy and Health Outcomes: An Updated Systematic Review. *Annals of Internal Medicine*. 2011;155(2):97-U89.
15. Austvoll-Dahlgren A, Nsangi A, Semakula D. Interventions and assessment tools addressing key concepts people need to know to appraise claims about treatment effects: a systematic mapping review. *Systematic Reviews* 2016;5:215.
16. Abrami PC, Bernard RM, Borokhovski E, Waddington DI, Wade CA, T. P. Strategies for Teaching Students to Think Critically: A Meta-Analysis. *Review of Educational Research* June 2015, Vol 85, No 2, pp 275– 314.

- 1  
2  
3  
4  
5  
6  
7  
8  
9  
10  
11  
12  
13  
14  
15  
16  
17  
18  
19  
20  
21  
22  
23  
24  
25  
26  
27  
28  
29  
30  
31  
32  
33  
34  
35  
36  
37  
38  
39  
40  
41  
42  
43  
44  
45  
46  
47  
48  
49  
50  
51  
52  
53  
54  
55  
56  
57  
58  
59  
60
17. Sorensen K, Van den Broucke S, Fullam J, Doyle G, Pelikan J, Slonska Z, et al. Health literacy and public health: a systematic review and integration of definitions and models. *BMC Public Health*. 2012;12:80.
  18. Sackett DL, Rosenberg WM, Gray JA, Haynes RB, Richardson WS. Evidence based medicine: what it is and what it isn't. *BMJ*. 1996;312(7023):71-2.
  19. Guyatt GH, Oxman AD, Schunemann HJ, Tugwell P, Knottnerus A. GRADE guidelines: A new series of articles in the *Journal of Clinical Epidemiology*. *J Clin Epidemiol*. 2011;64(4):380-82.
  20. Nsangi A., Semakula D., Oxman M., Austvoll-Dahlgren A., Rosenbaum S., Kaseje M., et al. Evaluation of resources to teach children in low income countries to assess claims about treatment effects. Protocol for a randomized trial. Submitted manuscript. 2016.
  21. Semakula D., Nsangi A., Oxman M., Austvoll-Dahlgren A., Rosenbaum S., Kaseje M., et al. Can an educational podcast improve the ability of parents of primary school children to assess claims about the benefits and harms of treatments? Protocol for a randomized trial Submitted manuscript. 2016.
  22. Austvoll-Dahlgren A, Oxman AD, Chalmers I, Nsangi A, Glenton C, Lewin S, et al. Key concepts that people need to understand to assess claims about treatment effects. *Journal of Evidence-Based Medicine*. 2015;8(3):112-25.
  23. Austvoll-Dahlgren A, Semakula D, Nsangi A, Oxman A, Chalmers I, Rosenbaum S, et al. Measuring ability to assess claims about treatment effects: The development of the "Claim Evaluation Tools". Accepted manuscript *BMJ open*. 2016.
  24. Case SC, DB S. *Constructing Written Test Questions For the Basic and Clinical Sciences* (Third edition). Philadelphia, USA: 2002.
  25. Hobart JC, Cano SJ, Zajicek JP, Thompson AJ. Rating scales as outcome measures for clinical trials in neurology: problems, solutions, and recommendations. *Lancet Neurol*. 2007;6(12):1094-105.
  26. Nsangi A, Semakula D, Oxman AD, Sewankambo NK. Teaching children in low-income countries to assess claims about treatment effects: prioritization of key concepts. *Journal of Evidence-Based Medicine*. 2015;8(4):173-80.
  27. Semakula D, Nsangi A, Oxman AD, Sewankambo NK. Priority setting for resources to improve the understanding of information about claims of treatment effects in the mass media. *Journal of Evidence-Based Medicine*. 2015;8(2):84-90.
  28. Linacre J. Sample size and item calibration stability. *Rasch Measurement Transactions*. 1994;7:328.
  29. Leonard M. *Rasch Promises: a Layman's Guide to the Rasch Method of Item Analysis*. Educational Research. 1980;22(3):188-92.
  30. Tennant A, Conaghan PG. The Rasch measurement model in rheumatology: what is it and why use it? When should it be applied, and what should one look for in a Rasch paper? *Arthritis Rheum*. 2007;57(8):1358-62.
  31. Guttersrud O, Dalane JO, Pettersen S. Improving measurement in nutrition literacy research using Rasch modelling: examining construct validity of stage-specific 'critical nutrition literacy' scales. *Public Health Nutr*. 2014;17(4):877-83.
  32. Conaghan PG, Emerton M, Tennant A. Internal construct validity of the Oxford Knee Scale: evidence from Rasch measurement. *Arthritis Rheum*. 2007;57(8):1363-7.
  33. Rasch analysis. <http://www.rasch-analysis.com/>. Accessed 2016.
  34. Tennant A, McKenna SP, Hagell P. Application of Rasch analysis in the development and application of quality of life instruments. *Value Health*. 2004;7 Suppl 1:S22-6.

- 1  
2  
3 35. Psylab Group. Introductory Rasch Analysis Using RUMM2030. The Section of Rehabilitation  
4 Medicine. University of Leeds: 2016.  
5 36. Displaying the RUMM2030 Analysis. Rasch Unidimensional Measurement Model. 2015.  
6 37. Brodersen J, Meads D, Kreiner S, Thorsen H, Doward L, McKenna S. Methodological aspects of  
7 differential item functioning in the Rasch model. J Med Econ. 2007;10:309 – 24.  
8 38. Marais I, Andrich D. Formalizing dimension and response violations of local independence in the  
9 unidimensional Rasch model. J Appl Meas. 2008;9(3):200-15.  
10 39. RUMM. Extending the RUMM2030 Analysis. 7. ed: RUMM Laboratory Pty Ltd. 2009.  
11 40. Hagell P. Testing Rating Scale Unidimensionality Using the Principal Component Analysis (PCA)/t-  
12 Test Protocol with the Rasch Model: The Primacy of Theory over Statistics. Open Journal of Statistics.  
13 2014  
14 41. Andrich D., Humphry SM., Marais I. Quantifying local, response dependence between two  
15 polytomous items using the. Applied Psychological Measurement 36(4), 309–324. 2012.  
16 42. Livingston SA ZM. Passing scores; A manual for setting standards of performance on educational  
17 and occupational tests. Educational Testing Service. 1982.  
18 43. Nedelsky L. Absolute grading standards for objective tests. Education and Psychological  
19 Measurement Journal. 1954;14(1):3-19.  
20 44. Angoff WH. 4. Angoff WH. Scales, norms, and equivalent scores. In: Thorndike RL (ed.).  
21 Educational Measurement Washington DC. 1971:514-5.  
22 45. Davies A., Gerrity M., Nordheim L., Okebukola P., Opiyo N., Sharples J., et al. Measuring ability to  
23 assess claims about treatment effects: establishment of a standard for passing and mastery. IHC  
24 Working Paper 2017; ISBN 978-82-8082-802-6.  
25  
26  
27  
28  
29  
30  
31

## Figure legends

32  
33  
34 *Figure 1. Example of a multiple choice-item taken from the Claim Evaluation Tools database*

35  
36 *Figure 2. The Item Characteristic Curve*

37  
38 *Figure 3. Item Person map for item set 1*

39  
40 *Figure 4. Item Person map for item set 2.*

41  
42 *Figure 5. Item Person map for item set 3*

43  
44 *Figure 6. Item Person map for item set 4*  
45  
46  
47  
48  
49  
50  
51  
52  
53  
54  
55  
56  
57  
58  
59  
60

1  
2  
3  
4  
5  
6  
7  
8  
9  
10  
11  
12  
13  
14  
15  
16  
17  
18  
19  
20  
21  
22  
23  
24  
25  
26  
27  
28  
29  
30  
31  
32  
33  
34  
35  
36  
37  
38  
39  
40  
41  
42  
43  
44  
45  
46  
47  
48  
49  
50  
51  
52  
53  
54  
55  
56  
57  
58  
59  
60

**21.** A review summarized studies comparing playing sports with other ways of making people happy. The review authors included all studies that found that sports improve people's happiness. Based on these studies, the review authors said that sport definitely improves happiness.

*Question:* **Do you agree with what the review authors said?**

*Options:*

- A) It is not possible to say without knowing the opinion of sports experts
- B) No. The review authors included only those studies with favorable results
- C) Yes. The review authors were sure that sports improves happiness
- D) Yes, the review authors included all of the studies with favorable results

**Answer:**

Figure 1. Example of a multiple choice-item taken from the Claim Evaluation Tools database

162x123mm (300 x 300 DPI)

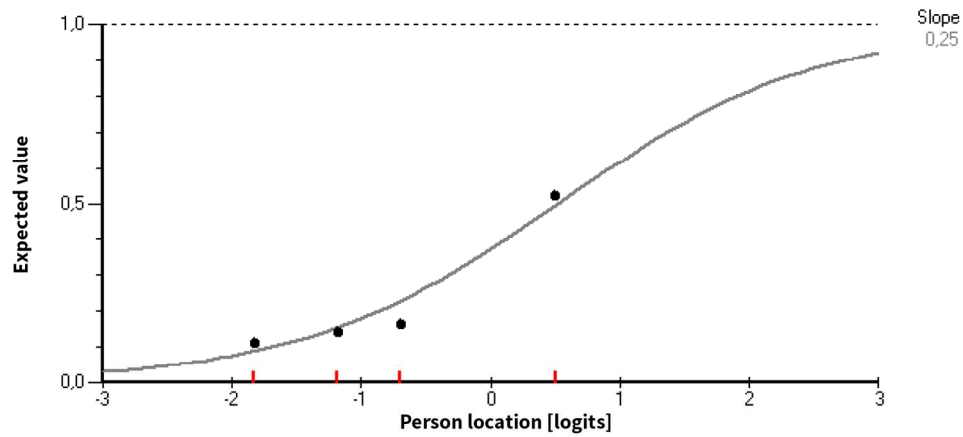

Figure 2. The Item Characteristic Curve

163x82mm (300 x 300 DPI)

1  
2  
3  
4  
5  
6  
7  
8  
9  
10  
11  
12  
13  
14  
15  
16  
17  
18  
19  
20  
21  
22  
23  
24  
25  
26  
27  
28  
29  
30  
31  
32  
33  
34  
35  
36  
37  
38  
39  
40  
41  
42  
43  
44  
45  
46  
47  
48  
49  
50  
51  
52  
53  
54  
55  
56  
57  
58  
59  
60

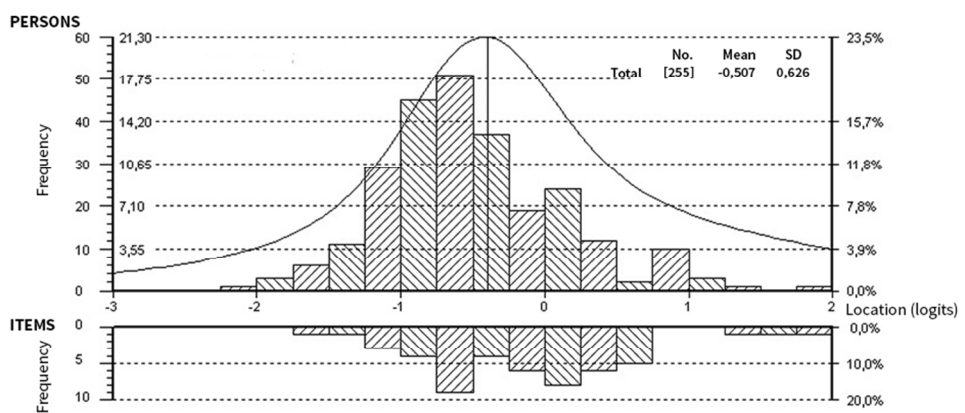

Figure 3. Item Person map for item set 1

82x37mm (300 x 300 DPI)

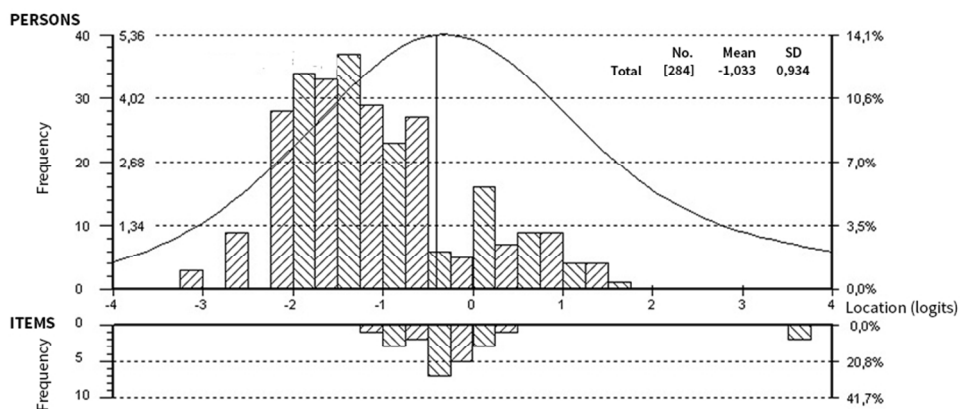

Figure 4. Item Person map for item set 2.

82x37mm (300 x 300 DPI)

1  
2  
3  
4  
5  
6  
7  
8  
9  
10  
11  
12  
13  
14  
15  
16  
17  
18  
19  
20  
21  
22  
23  
24  
25  
26  
27  
28  
29  
30  
31  
32  
33  
34  
35  
36  
37  
38  
39  
40  
41  
42  
43  
44  
45  
46  
47  
48  
49  
50  
51  
52  
53  
54  
55  
56  
57  
58  
59  
60

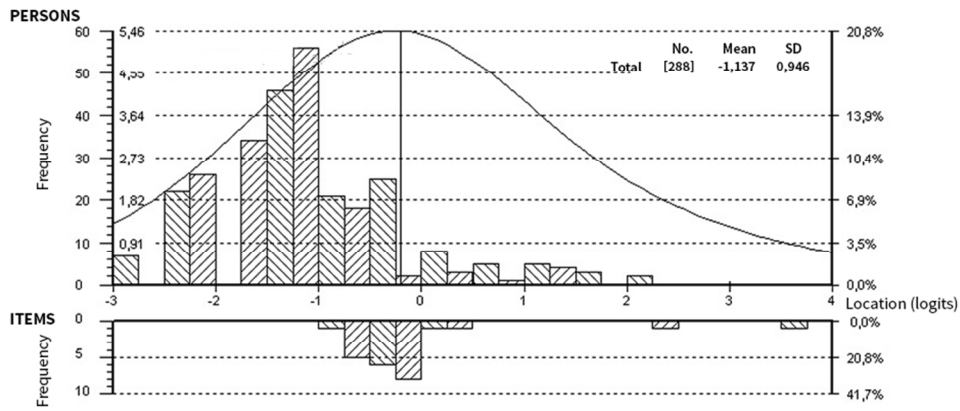

Figure 5. Item Person map for item set 3

82x37mm (300 x 300 DPI)



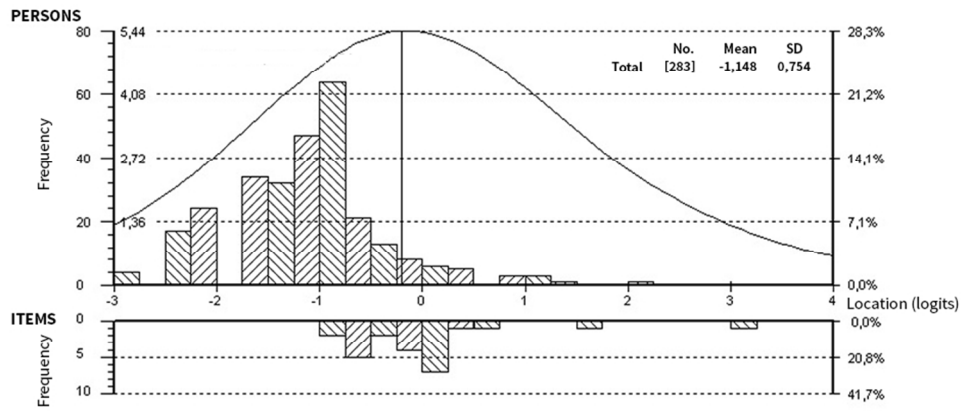

Figure 6. Item Person map for item set 4

82x37mm (300 x 300 DPI)

er review only

1  
2  
3  
4  
5  
6  
7  
8  
9  
10  
11  
12  
13  
14  
15  
16  
17  
18  
19  
20  
21  
22  
23  
24  
25  
26  
27  
28  
29  
30  
31  
32  
33  
34  
35  
36  
37  
38  
39  
40  
41  
42  
43  
44  
45  
46  
47  
48  
49  
50  
51  
52  
53  
54  
55  
56  
57  
58  
59  
60

1  
2  
3  
4  
5  
6  
7  
8  
9  
10  
11  
12  
13  
14  
15  
16  
17  
18  
19  
20  
21  
22  
23  
24  
25  
26  
27  
28  
29  
30  
31  
32  
33  
34  
35  
36  
37  
38  
39  
40  
41  
42  
43  
44  
45  
46  
47  
48  
49  
50  
51  
52  
53  
54  
55  
56  
57  
58  
59  
60

**1.** A doctor did a study to find out if drinking tea keeps people from getting sick. The doctor tossed a coin to decide who should get the tea and who should not. People who got tea went to the doctor's office every day to drink their tea. At the end of the study, people who got the tea were less likely to be sick than those who got no tea.

*Based on the text above, please answer the following questions:*

**1.1 Who went to the doctor's office every day?**

*Options:*

- A) People who did not get tea
- B) People who got tea
- C) Everyone
- D) People who got sick

**Answer:**

**1.2. How did the doctor decide who should get tea?**

*Options:*

- A) By tossing a coin
- B) By asking people what they would like
- C) They gave tea to those who were more likely to be sick
- D) They asked people who came to their office

**Answer:**

1  
2  
3  
4  
5  
6  
7  
8  
9  
10  
11  
12  
13  
14  
15  
16  
17  
18  
19  
20  
21  
22

### 1.3. What was the treatment?

*Options:*

- A) Tea
- B) Sleep
- C) The study
- D) The doctors

Answer:

23  
24  
25  
26  
27  
28  
29  
30  
31  
32  
33  
34  
35  
36  
37  
38  
39  
40  
41  
42  
43  
44  
45  
46  
47  
48  
49  
50  
51  
52  
53  
54  
55  
56  
57  
58  
59  
60

### 1.4. What was the result of the study?

*Options:*

- A) Drinking tea can help people from getting sick
- B) Doctors should toss coins when doing studies
- C) People should go to the doctor if they are sick
- D) Not drinking tea can help people from getting sick

Answer:

# BMJ Open

## Measuring ability to assess claims about treatment effects: A latent trait analysis of items from the "Claim Evaluation Tools" database using Rasch modelling

|                                 |                                                                                                                                                                                                                                                                                                                                                                     |
|---------------------------------|---------------------------------------------------------------------------------------------------------------------------------------------------------------------------------------------------------------------------------------------------------------------------------------------------------------------------------------------------------------------|
| Journal:                        | <i>BMJ Open</i>                                                                                                                                                                                                                                                                                                                                                     |
| Manuscript ID                   | bmjopen-2016-013185.R2                                                                                                                                                                                                                                                                                                                                              |
| Article Type:                   | Research                                                                                                                                                                                                                                                                                                                                                            |
| Date Submitted by the Author:   | 10-Mar-2017                                                                                                                                                                                                                                                                                                                                                         |
| Complete List of Authors:       | Austvoll-Dahlgren, Astrid; Norwegian Institute of Public Health<br>Guttersrud, Øystein; Norwegian Centre for Science Education, University of Oslo<br>Nsangi, Allen; Makerere University College of Health Sciences, School of Medicine<br>Semakula, Daniel; Makerere University College of Health Sciences,<br>Oxman, Andrew; Norwegian Institute of Public Health |
| <b>Primary Subject Heading</b>: | Patient-centred medicine                                                                                                                                                                                                                                                                                                                                            |
| Secondary Subject Heading:      | Research methods, Public health, Health policy                                                                                                                                                                                                                                                                                                                      |
| Keywords:                       | evidence based medicine, health literacy, outcome measurement, multiple-choice, Rasch analysis, patient education                                                                                                                                                                                                                                                   |
|                                 |                                                                                                                                                                                                                                                                                                                                                                     |

SCHOLARONE™  
Manuscripts

1  
2  
3 **Measuring ability to assess claims about treatment effects: A latent trait**  
4 **analysis of items from the “Claim Evaluation Tools” database using Rasch**  
5 **modelling**  
6  
7  
8  
9

10  
11  
12 **Astrid Austvoll-Dahlgren, Øystein Guttersrud, Allen Nsangi, Daniel Semakula, Andrew D. Oxman, The**  
13 **IHC group\***

14  
15  
16 **Iain Chalmers**

17  
18  
19 **Leila Cusack**

20  
21  
22 **Claire Glenton**

23  
24  
25 **Tammy Hoffmann**

26  
27  
28 **Margaret Kaseje**

29  
30  
31 **Simon Lewin**

32  
33  
34 **Leah Atieno Marende**

35  
36  
37 **Michael Mugisha**

38  
39  
40 **Laetitia Nyirazinyoye**

41  
42  
43 **Kjetil Olsen**

44  
45  
46 **Matthew Oxman**

47  
48  
49 **Sarah Rosenbaum**

50  
51  
52 **Nelson K. Sewankambo**

53  
54  
55 **Anne Marie Uwitonze**

56  
57 [Astrid Austvoll-Dahlgren \(corresponding author\)](#)

58  
59 [astrid.austvoll-dahlgren@fhi.no](mailto:astrid.austvoll-dahlgren@fhi.no)

1  
2  
3 +47 41294057  
4

5 Norwegian Institute of Public Health

6 BOKS 7004 St.Olavsplass

7  
8 0130 Oslo, Norway  
9

10  
11 Øystein Guttersrud

12 oystein.guttersrud@naturfagsenteret.no

13 Norwegian Centre for Science Education, University of Oslo

14 Postboks 1106, Blindern 0317 Oslo, Norway  
15  
16  
17  
18  
19

20 Allen Nsangi

21 nsallen2000@yahoo.com

22 Makerere University College of Health Sciences.

23 New Mulago Hospital Complex, Administration Building, Second Floor.

24 P.O.Box 7072, Kampala Uganda  
25  
26  
27  
28  
29  
30

31 Daniel Semakula

32 semakuladaniel@gmail.com

33 Makerere University College of Health Sciences.

34 New Mulago Hospital Complex, Administration Building, Second Floor.

35 P.O.Box 7072, Kampala Uganda  
36  
37  
38  
39  
40

41 Andrew D. Oxman

42 oxman@online.no

43 Norwegian Institute of Public Health

44 BOKS 7004 St.Olavsplass

45  
46 0130 Oslo, Norway  
47  
48  
49  
50  
51  
52  
53

54 **Keywords: evidence based medicine, shared decision making, health literacy, outcome measurement,**  
55 **multiple-choice, patient education, Rasch analysis**  
56

## Abstract

**Background:** The Claim Evaluation Tools database contains multiple-choice items for measuring people's ability to apply the key concepts they need to know to be able to assess treatment claims. We assessed items from the database using Rasch analysis to develop an outcome measure to be used in two randomised trials in Uganda. Rasch analysis is a form of psychometric testing relying on Item Response Theory. It is a dynamic way of developing outcome measures that are valid and reliable.

**Objectives:** To assess the validity, reliability, and responsiveness of 88 items addressing 22 key concepts using Rasch analysis.

**Participants:** We administered four sets of multiple-choice items in English to 1114 people in Uganda and Norway, of which 685 were children and 429 were adults (including 171 health professionals). We scored all items dichotomously. We explored summary and individual fit statistics using the RUMM2030 analysis package. We used SPSS to perform distractor analysis.

**Results:** Most items conformed well to the Rasch model but some items needed revision. Overall, the four item sets had satisfactory reliability. We did not identify significant response dependence between any pairs of items and, overall, the magnitude of multidimensionality in the data was acceptable. The items had a high level of difficulty.

**Conclusion:** Most of the items conformed well to the Rasch model's expectations. Following revision of some items, we concluded that most of the items were suitable for use in an outcome measure for evaluating the ability of children or adults to assess treatment claims.

## Strengths and limitations of this study

- To our knowledge, this is the first Rasch analysis of multiple-choice items that measure people's ability to assess claims about treatment effects.
- We have used robust methods to evaluate the items' validity and reliability in two settings, allowing for evidence informed revisions.
- Our analyses suggest that most items have acceptable model fit and can be used in the settings where they were tested.
- The items might function differently when translated or used in other settings.

For peer review only



## Background

People are confronted with claims about treatment effects daily. This includes claims about the effects of changes in health behaviour, screening, other preventive interventions, therapeutic interventions, rehabilitation, and public health and health system interventions that are targeted at groups of people. A “treatment claim” is something someone says about whether a treatment causes something to happen or to change; for example, that Vitamin C prevents you from getting the common cold. A claim can be true or can be false (1-4). Many of these claims are not based on evidence from fair comparisons of treatments, and many patients and health professionals alike do not have the necessary skills to assess the reliability of these claims (5-11). Being able to think critically and make informed decisions is essential for engaging patients in clinical decisions and citizens in policy decisions (10, 12-14).

Interest in promoting critical thinking cuts across disciplines (15). There are many definitions and conceptualisations of critical thinking. In the learning sciences, critical thinking is defined as “purposeful, self-regulatory judgment that results in interpretation, analysis, evaluation, and inference, as well as explanations of the considerations on which that judgment is based” (16). There is debate about the extent to which critical thinking skills are “generic” and the extent to which they are content specific. Critical thinking is also a component of health literacy (17). In health literacy studies, critical thinking is content specific, focussing on people’s ability to think critically about health information. However, definitions of this component of health literacy are often fuzzy. They seldom describe which criteria patients should apply when thinking critically about health information (15). Critical thinking is also a key component of evidence-based practice. As in health literacy studies, critical thinking in evidence-based practice is content specific, but is operationalised as practical skills such as the ability to formulate questions, find relevant research, and assess the certainty of research evidence using explicit criteria (15, 18, 19).

Efforts to promote critical thinking as a component of evidence-based practice have largely focussed on health professionals. However, interest in helping patients and the public to make evidence-informed decisions is growing (11). One such initiative is the [Informed Healthcare Choices](#) (IHC) project, which aims to help people to assess treatment claims and make informed health choices. The project has developed primary school resources and a podcast series to improve the ability of children and their

1  
2  
3  
4  
5  
6  
7  
8  
9  
10  
11  
12  
13  
14  
15  
16  
17  
18  
19  
20  
21  
22  
23  
24  
25  
26  
27  
28  
29  
30  
31  
32  
33  
34  
35  
36  
37  
38  
39  
40  
41  
42  
43  
44  
45  
46  
47  
48  
49  
50  
51  
52  
53  
54  
55  
56  
57  
58  
59  
60

parents to assess claims about treatment effects. We have piloted these resources in Uganda, Kenya, Rwanda, and Norway. We will test the effects of the resources in randomized trials in Uganda (20, 21).

#### *The Claim Evaluation Tools database*

The first step in the IHC project was to identify the Key Concepts people need to know to be able to assess treatment effects (22). This resulted in an initial list of 32 Key Concepts that serves as a syllabus for designing learning resources (22). This was also the starting point for the IHC learning resources. We present a short list of the Key Concepts in table 1. This list is hosted by [testingtreatments.org](http://testingtreatments.org), and is an evolving document subject to annual revisions.

Looking for suitable measurement tools to be used in the IHC trials, we conducted a systematic mapping review of interventions and assessment tools addressing the Key Concepts (15). Based on the findings of this review, we concluded that this research is heterogeneous and that outcomes are measured inconsistently (15). Furthermore, we found no instrument that addressed all the Key Concepts, or that would be suitable as an outcome measure in trials of the IHC learning resources. We therefore developed a database of multiple-choice items that could be used outcome measures in the two IHC trials in Uganda, as well for other purposes. The Claim Evaluation Tools database includes four or more items that address each of the Key Concepts. We developed these items in four steps, using qualitative and quantitative methods, over a three year period (2013-2016) (23):

- (i) Determination of the scope of the database, writing and revising items;
- (ii) Expert item review and feedback (face validity);
- (iii) Cognitive interviews with end-users - including children, parents, teachers and patient representatives - to assess relevance, understanding and acceptability; and
- (iv) Piloting and practical administrative tests of the items in different contexts.

Instead of a standard, fixed questionnaire, we wanted to create a database from which teachers and researchers can choose items relevant to their purposes and target groups, and design their own tests or questionnaires (23). We developed all items in English, but translations are now also available in Luganda (Uganda), Norwegian, German, Spanish (Mexico), and Chinese. Currently, the database includes approximately 190 items. The items are designed to be relevant across different contexts, and can be used for children (from ages 10 and up) and adults (including both patients and health professionals) (23). We use “one-best answer” response options in all items, with one answer being unambiguously

the “best” and the remaining options “worse” (see figure 1 for an example of a multiple-choice item) (24).

We describe the development of the items in more detail elsewhere (23). We describe here the first psychometric testing, using Rasch analysis, of items from the Claim Evaluation Tools database. The items were selected for use in an outcome measure for trials of the IHC primary school resources and podcast. The purpose of the Rasch analysis is to ensure the validity and reliability of the outcome measure (25).

Table 1. Key Concepts that people need to understand to assess claims about treatment effects

| <b>Informed Health Choices Concepts</b>                                                                                                                                          |
|----------------------------------------------------------------------------------------------------------------------------------------------------------------------------------|
| <b>1. Recognising the need for fair comparisons of treatments</b><br><i>[Fair treatment comparisons are needed]</i>                                                              |
| 1.1 Treatments may be harmful<br><i>[Treatments can harm]</i>                                                                                                                    |
| 1.2 Personal experiences or anecdotes (stories) are an unreliable basis for determining the effects of most treatments<br><i>[Anecdotes are not reliable evidence]</i>           |
| 1.3 A treatment outcome may be associated with a treatment, but not caused by the treatment<br><i>[Association is not necessarily causation]</i>                                 |
| 1.4 Widely used or traditional treatments are not necessarily beneficial or safe<br><i>[Practice is often not based on evidence]</i>                                             |
| 1.5 New, brand-named, or more expensive treatments may not be better than available alternatives<br><i>[New treatments are not always better]</i>                                |
| 1.6 Opinions of experts or authorities do not alone provide a reliable basis for deciding on the benefits and harms of treatments<br><i>[Expert opinion is not always right]</i> |
| 1.7 Conflicting interests may result in misleading claims about the effects of treatments<br><i>[Be aware of conflicts of interest]</i>                                          |
| 1.8 Increasing the amount of a treatment does not necessarily increase the benefits of a treatment and may cause harm<br><i>[More is not necessarily better]</i>                 |

|    |                                                                                                                                     |
|----|-------------------------------------------------------------------------------------------------------------------------------------|
| 1  |                                                                                                                                     |
| 2  |                                                                                                                                     |
| 3  |                                                                                                                                     |
| 4  | 1.9 Earlier detection of disease is not necessarily better                                                                          |
| 5  | <i>[Earlier is not necessarily better]</i>                                                                                          |
| 6  |                                                                                                                                     |
| 7  | 1.10 Hope can lead to unrealistic expectations about the effects of treatments                                                      |
| 8  | <i>[Avoid unrealistic expectations]</i>                                                                                             |
| 9  |                                                                                                                                     |
| 10 | 1.11 Beliefs about how treatments work are not reliable predictors of the actual effects of treatments                              |
| 11 | <i>[Theories about treatment can be wrong]</i>                                                                                      |
| 12 |                                                                                                                                     |
| 13 |                                                                                                                                     |
| 14 | 1.12 Large, dramatic effects of treatments are rare                                                                                 |
| 15 | <i>[Dramatic treatment effects are rare]</i>                                                                                        |
| 16 |                                                                                                                                     |
| 17 |                                                                                                                                     |
| 18 |                                                                                                                                     |
| 19 |                                                                                                                                     |
| 20 | 2. Judging whether a comparison of treatments is a fair comparison                                                                  |
| 21 | <i>[Treatment comparisons should be fair]</i>                                                                                       |
| 22 |                                                                                                                                     |
| 23 | 2.1 Evaluating the effects of treatments requires appropriate comparisons                                                           |
| 24 | <i>[Treatment comparisons are necessary]</i>                                                                                        |
| 25 |                                                                                                                                     |
| 26 |                                                                                                                                     |
| 27 | 2.2 Apart from the treatments being compared, the comparison groups need to be similar (i.e. 'like needs to be compared with like') |
| 28 | <i>[Compare like with like]</i>                                                                                                     |
| 29 |                                                                                                                                     |
| 30 |                                                                                                                                     |
| 31 |                                                                                                                                     |
| 32 | 2.3 People's experiences should be counted in the group to which they were allocated                                                |
| 33 | <i>[Base analyses on allocated treatment]</i>                                                                                       |
| 34 |                                                                                                                                     |
| 35 |                                                                                                                                     |
| 36 | 2.4 People in the groups being compared need to be cared for similarly (apart from the treatments being compared)                   |
| 37 | <i>[Treat comparison groups similarly]</i>                                                                                          |
| 38 |                                                                                                                                     |
| 39 | 2.5 If possible, people should not know which of the treatments being compared they are receiving                                   |
| 40 | <i>[Blind participants to their treatments]</i>                                                                                     |
| 41 |                                                                                                                                     |
| 42 |                                                                                                                                     |
| 43 | 2.6 Outcomes should be measured in the same way (fairly) in the treatment groups being compared                                     |
| 44 | <i>[Assess outcome measures fairly]</i>                                                                                             |
| 45 |                                                                                                                                     |
| 46 |                                                                                                                                     |
| 47 | 2.7 It is important to measure outcomes in everyone who was included in the treatment comparison groups                             |
| 48 | <i>[Follow up everyone included]</i>                                                                                                |
| 49 |                                                                                                                                     |
| 50 |                                                                                                                                     |
| 51 |                                                                                                                                     |
| 52 |                                                                                                                                     |
| 53 | <b>3. Understanding the role of chance</b>                                                                                          |
| 54 | <i>[Understand the role of chance]</i>                                                                                              |
| 55 |                                                                                                                                     |
| 56 |                                                                                                                                     |
| 57 |                                                                                                                                     |
| 58 |                                                                                                                                     |
| 59 |                                                                                                                                     |
| 60 |                                                                                                                                     |

|    |                                                                                                                          |
|----|--------------------------------------------------------------------------------------------------------------------------|
| 1  |                                                                                                                          |
| 2  |                                                                                                                          |
| 3  |                                                                                                                          |
| 4  | 3.1 Small studies in which few outcome events occur are usually not informative and the results may be misleading        |
| 5  | <i>[Small studies may be misleading]</i>                                                                                 |
| 6  |                                                                                                                          |
| 7  | 3.2 The use of p-values to indicate the probability of something having occurred by chance may be misleading; confidence |
| 8  | intervals are more informative                                                                                           |
| 9  | <i>[P-values alone can be misleading]</i>                                                                                |
| 10 |                                                                                                                          |
| 11 | 3.3 Saying that a difference is statistically significant or that it is not statistically significant can be misleading  |
| 12 | <i>['Significance' may be misleading]</i>                                                                                |
| 13 |                                                                                                                          |
| 14 |                                                                                                                          |
| 15 |                                                                                                                          |
| 16 |                                                                                                                          |
| 17 |                                                                                                                          |
| 18 | <b>4. Considering all of the relevant fair comparisons</b>                                                               |
| 19 | <i>[Consider all the relevant evidence]</i>                                                                              |
| 20 |                                                                                                                          |
| 21 | 4.1 The results of single tests of treatments can be misleading                                                          |
| 22 | <i>[Single studies can be misleading]</i>                                                                                |
| 23 |                                                                                                                          |
| 24 |                                                                                                                          |
| 25 | 4.2 Reviews of treatment tests that do not use systematic methods can be misleading                                      |
| 26 | <i>[Unsystematic reviews can mislead]</i>                                                                                |
| 27 |                                                                                                                          |
| 28 | 4.3 Well done systematic reviews often reveal a lack of relevant evidence, but they provide the best basis for making    |
| 29 | judgements about the certainty of the evidence                                                                           |
| 30 | <i>[Consider how certain the evidence is]</i>                                                                            |
| 31 |                                                                                                                          |
| 32 |                                                                                                                          |
| 33 |                                                                                                                          |
| 34 |                                                                                                                          |
| 35 |                                                                                                                          |
| 36 | <b>5. Understanding the results of fair comparisons of treatments</b>                                                    |
| 37 | <i>[Understand the results of comparisons]</i>                                                                           |
| 38 |                                                                                                                          |
| 39 | 5.1 Treatments may have beneficial and harmful effects                                                                   |
| 40 | <i>[Weigh benefits and harms of treatment]</i>                                                                           |
| 41 |                                                                                                                          |
| 42 |                                                                                                                          |
| 43 | 5.2 Relative effects of treatments alone can be misleading                                                               |
| 44 | <i>[Relative effects can be misleading]</i>                                                                              |
| 45 |                                                                                                                          |
| 46 | 5.3 Average differences between treatments can be misleading                                                             |
| 47 | <i>[Average differences can be misleading]</i>                                                                           |
| 48 |                                                                                                                          |
| 49 |                                                                                                                          |
| 50 |                                                                                                                          |
| 51 |                                                                                                                          |
| 52 | <b>6. Judging whether fair comparisons of treatments are relevant</b>                                                    |
| 53 | <i>[Judge relevance of fair comparisons]</i>                                                                             |
| 54 |                                                                                                                          |
| 55 |                                                                                                                          |
| 56 |                                                                                                                          |
| 57 |                                                                                                                          |
| 58 |                                                                                                                          |
| 59 |                                                                                                                          |
| 60 |                                                                                                                          |

|                                                                                                                                                      |
|------------------------------------------------------------------------------------------------------------------------------------------------------|
| 6.1 Fair comparisons of treatments should measure outcomes that are important<br><i>[Outcomes studied may not be relevant]</i>                       |
| 6.2 Fair comparisons of treatments in animals or highly selected groups of people may not be relevant<br><i>[People studied may not be relevant]</i> |
| 6.3 The treatments evaluated in fair comparisons may not be relevant or applicable<br><i>[Treatments used may not be relevant]</i>                   |
| 6.4 Results for a selected group of people within fair comparisons can be misleading<br><i>[Beware of subgroup analyses]</i>                         |

Please enter figure 1. Example of a multiple choice-item taken from the Claim Evaluation Tools database

## Objective

To assess the validity, reliability, and responsiveness of multiple-choice items from the Claim Evaluation Tools database, using Rasch analysis, in English speaking populations in Uganda and Norway.

## Methods

### Scope and setting

Most of the data collection took place in Uganda. The reason for this was that we intended to use the items from the Claim Evaluation Tools database as the primary outcome measure for the IHC trials there. The items in the Claim Evaluation tools database are expected to work in the same way for children and adults (23). Consequently, for this evaluation, we needed a sample including both children and adults to explore item bias (differential item functioning) associated with age. We also needed a mix of people with and without relevant training. For these purposes, we invited children (in year-5 of primary school, with a starting age of 10 years) and adults who had participated in piloting of the IHC resources. We also recruited children, parents and other adults (without training) through our networks in Uganda established at the start of the IHC project (26, 27).

We also included a group of children who had participated in a pilot of the IHC primary school resources at an international school in Norway. Although this was a small sample, it provided an indication of the

1  
2  
3 fit to the Rasch model in an international population, and provide information on difficulty and  
4 differential item functioning in the two different settings.  
5  
6  
7  
8  
9

### 10 **Test administration and sample size**

11  
12 We evaluated 88 items addressing the 22 Key Concepts initially targeted by two IHC interventions (26,  
13 27). Having multiple items for each concept allows us to delete items with poor fit to the Rasch model.  
14 In addition, Rasch analysis provides information on each item's difficulty. Having a range of items with  
15 different difficulties addressing each Key Concept can be useful for measurement purposes, for example  
16 when used in Computer Adaptive Testing.  
17  
18  
19  
20

21  
22 There is no consensus on the sample size needed to perform a Rasch analysis (28). This is a pragmatic  
23 judgement that takes account of the number of items evaluated and the statistical power needed to  
24 identify item bias resulting from relevant background factors. Since we intended to test many items, we  
25 did not consider it feasible to include these in a single test, and split the items into four sets or "tests".  
26 We aimed to include approximately 250 respondents in Uganda for each of the four tests.  
27  
28  
29  
30

31  
32 The children in Norway only responded to one set (out of the four). In both settings, we administered  
33 the items in English, since this was the official school language in both the Norwegian international  
34 school and the Ugandan schools. The data collection took place in 2015.  
35  
36  
37

38 In developing the Claim Evaluation Tools database, low literacy skills were identified as a potential  
39 barrier in the Ugandan setting (23). Consequently, we developed four items to evaluate the respondents'  
40 text recognition and understanding as an indication of their reading ability (see Appendix 1). We tested  
41 these items using the Lexile Analyser, and the items were found to fit within typical reading measures  
42 for 5<sup>th</sup> graders (29). We designed the items to resemble the multiple-choice items addressing the Key  
43 Concepts. The first two items required the respondents to identify the correct text in the scenario. The  
44 latter two items assessed whether the respondent understood the information in the scenario.  
45  
46  
47  
48  
49  
50  
51  
52

### 53 **Rasch analysis**

1  
2  
3 Rasch analysis is used to check the degree to which scoring and summing-up across items is defensible  
4 in the data collected (30, 31). It is a unified approach to address important measurement issues required  
5 for validating an outcome measure such as a scale or a test, including testing for; internal construct  
6 validity for multidimensionality, invariance of the items (item-person-interaction), and item bias  
7 (differential item function)(31).  
8  
9

10  
11  
12 Rasch analysis has been used successfully in many disciplines including health research, and can be  
13 applied to both dichotomous and polytomous data (31-33). Rasch analysis also provides an excellent  
14 basis for developing and revising items, and in construction of item banks. Misfit to the Rasch model  
15 might be diagnosed and items can be deleted or revised to improve model fit (34). In this way, Rasch  
16 analysis represents a dynamic approach to achieving construct validity, in which revisions are informed  
17 by the evidence (34). For this analysis, we scored all items dichotomously. We used Excel for data entry,  
18 RUMM2030 for Rasch analysis and SPSS for a simple classical test theory approach to distractor analysis.  
19 We report the steps we took in our analysis below following the fundamental aspects of Rasch analysis  
20 (31).  
21  
22  
23  
24  
25  
26  
27  
28  
29  
30  
31

### 32 **Summary statistics and overall fit**

33  
34 In Rasch analysis, the response patterns to an item set are tested against what is expected by the model,  
35 i.e. the ratio between any two items should be constant across different ability groups (31). For this  
36 study, ability refers to the “ability to critically assess claims about treatment effects”. In other words, the  
37 easier the item is, the more likely it will be answered correctly; and the more able the person is, the  
38 more likely he or she will answer correctly (35). We explored this relationship between the expected and  
39 observed data using the summary statistics function in RUMM2030.  
40  
41  
42  
43  
44

45 The overall Item-Person Interaction is presented on a logit scale, and in RUMM2030 the mean item  
46 location is always given as a zero. A mean person location higher than “0” indicates that on average, the  
47 test is “too easy” and that the response group have a higher ability than the difficult level of the test. A  
48 mean person location lower than “0” suggests the test is “too hard”.  
49  
50  
51  
52

53 From this analysis, we also report the item and person Fit Residual Statistics; this assesses the degree of  
54 divergence (or residual) between the expected and observed data for each person item when summed  
55  
56  
57



1  
2  
3 for all items and all persons respectively. In RUMM2030 this is reported as an approximate z-score,  
4 representing a standardized normal distribution (36). Ideally, item fit and person fit should have a mean  
5 of zero and a SD of one (31).  
6  
7

8  
9 The Item-Trait- Interaction in RUMM2030 is a test of invariance to the scale, and whether or not the  
10 data fit the model for the discreet ability groups (37). Ideally, the Chi-Square probability value should be  
11 greater than 0.05, indicating that there is no “statistically significant” deviation between the observed  
12 data and what is expected from the model.  
13  
14  
15

### 16 17 18 19 20 **Power of test of fit and reliability**

21  
22 The Person-Separation Index is an indicator of the power of a set of items to discriminate between  
23 ability groups and individuals (36). We considered a Person-Separation-Index greater than 0.7 to be  
24 acceptable (36). We also calculated Cronbach’s Alpha as a measure of the reliability of each set of items.  
25 We considered a value of 0.7 or higher to be adequate for this. In RUMM2030, Cronbach’s Alpha can  
26 only be estimated if there are no missing data. We solved this by coding missing responses as “incorrect”  
27 responses (36).  
28  
29  
30  
31  
32  
33  
34  
35

### 36 37 38 39 40 41 42 **Individual person and item fit**

43 We investigated individual person fit. Misfit violates the principles of the Guttman structure and may  
44 indicate different types of error, such as guessing.

45 The Item Characteristic Curve indicates the theoretically expected probability of answering correctly as a  
46 function of ability on the latent trait scale (see Figure 2 for an example of an Item Characteristic Curve).  
47 We inspected Item Characteristic Curves and used Chi-square values as single item fit indices using a  
48 0.05 as our significance level. Using Bonferroni adjustment, the significance level was adjusted ( $p =$   
49  $0.05/k$ ) according to the number of  $k$  significance tests carried out (one for each item).  
50  
51

52 We also performed distractor analysis using SPSS. This is particularly useful when developing and  
53 revising multiple-choice items, because it may identify response options that are not working as  
54 intended and can subsequently be deleted or revised.  
55  
56

1  
2  
3  
4  
5  
6 Please insert figure 2. The Item Characteristic Curve  
7  
8  
9

10  
11 The curve in figure 2 represents the expected probability of answering correctly, and the dots represent  
12 the observed proportion of correct answers for some intervals of ability estimates (class intervals).

13  
14 When the observed proportions fit the curve, the data fit the Rasch model. Items with sub-optimal fit  
15 indicate measurement error (36).  
16

17  
18  
19 When two groups of people (for example children and adults) respond differently to an item despite  
20 equal ability, that item displays “within item bias” or differential item functioning (DIF) and invariance is  
21 violated (38). There are two types of DIF. Uniform DIF is when one group of people perform consistently  
22 better on an item; for example, when an item is easier for all adults across all ability groups compared to  
23 children. This is less problematic than non-uniform DIF, where the differences between the groups vary  
24 across levels of the attribute (31).  
25  
26  
27  
28

29  
30 We explored DIF for setting and age using ANOVA in RUMM2030. We also explored DIF by reading  
31 ability. This was done by pragmatically categorising the responses to the four reading ability items into  
32 two groups (merging respondents with 0, 1 or 2 correct responses and those with 3 or 4 correct  
33 responses).  
34  
35  
36  
37  
38  
39

#### 40 **Testing for multidimensionality and response dependency**

41  
42 Unidimensionality - having just one trait underlying responses - is a fundamental requirement of  
43 measurement and is explored using Rasch analysis (35). Furthermore, there should be no response  
44 dependency in the data; i.e. people’s responses to an item should not have a bearing on their responses  
45 to other items (39). Response dependence results in redundancy in the data and inefficient measures.  
46  
47  
48

49  
50 We explored possible dimension violations of local independence applying the PCA/t-test procedure  
51 computing paired t-tests using two sub-sets of items from each item set. The hypothesis of a  
52 unidimensional scale is weakened when the proportion of individuals with statistically significant  
53 differences in ability estimates on a pair of subscales exceeds 5% (40). We also inspected the residual  
54  
55  
56  
57

1  
2  
3 correlation matrix estimated in RUMM2030 (41). We considered residual correlations above 0.3 as  
4 indicators of response dependence between items (42).  
5  
6  
7  
8  
9

## 10 **Results**

### 11 **Description of sample**

12  
13  
14 The total sample included 1114 people, among whom 685 were children and 429 were adults (including  
15 171 health professionals). Of these 1114 people, 329 had received some form of training related to the  
16 Key Concepts. The Norwegian sample equalled 5% (59 respondents) out of the total respondents. The  
17 mean number of missing and incorrectly filled in responses was <1% per item set. Less than 1/3  
18 responded correctly to all four reading test questions in the Ugandan sample.  
19  
20  
21  
22  
23  
24  
25  
26  
27

### 28 **Summary statistics and overall fit**

29  
30  
31 Overall, the items were difficult with no very easy items and no extremely difficult items (see figure 2 for  
32 the item threshold distributions per set). The mean person locations per set were -0.81, -1.06, -1.15 and  
33 -1.15 logits, respectively. Fit Statistics are presented in table 2. Mean item fit residuals and person fit  
34 residuals were satisfactory and close to 0, although the standard errors for set 1 and 2 is somewhat  
35 higher than what we would like to see. The Item-Person maps for all sets are available in figures 3 to 6.  
36 The upper part of the Item-Person map represents respondents' ability levels; the lower part show the  
37 distribution of item locations. From this we can see that, overall, the tests are difficult. This suggests that  
38 that easier items might be needed to make these tests more sensitive (able to separate between people  
39 at the lower end of the scale (those with lower ability) (36). The Chi square probability was 0.00 for all  
40 sets, indicating that not all items may work as expected.  
41  
42  
43  
44  
45  
46  
47  
48

49 The estimated reliability indices were acceptable (Cronbach's Alpha > 0.70 for all sets with exception of  
50 set 4 where the value was 0.63). Similarly, the Person-Separation Indexes were satisfactory for all sets  
51 with the exception of set 4 which had a value of 0.54.  
52  
53  
54

55 Table 2. Overall fit statistics and tests of local independence by set  
56  
57  
58  
59  
60

| Item set                                                     | 1            | 2            | 3            | 4            |
|--------------------------------------------------------------|--------------|--------------|--------------|--------------|
| <b>Summary statistics</b>                                    |              |              |              |              |
| Persons (n)                                                  | 255          | 287          | 289          | 283          |
| Mean item fit residual (sd)                                  | 0.02 (1.83)  | -0.03 (1.52) | -0.14 (1.11) | -0.08 (1.38) |
| Mean person location (sd)                                    | -0.81 (1.00) | -1.06 (0.97) | -1.15 (0.96) | -1.15 (0.75) |
| Overall Chi-square value (df)                                | 177.6 (75)   | 194.3 (96)   | 189.5(96)    | 170.7 (72)   |
| Chi-square probability                                       | 0.00         | 0.00         | 0.00         | 0.00         |
| Person Separation Index                                      | 0.75         | 0.70         | 0.69         | 0.54         |
| Cronbach's Alpha                                             | 0.81         | 0.78         | 0.78         | 0.63         |
| Items with misfit (n)                                        | 2            | 1            | 1            | 1            |
| Persons with misfit (n)                                      | 0            | 2            | 1            | 3            |
| <b>Tests for multidimensionality and response dependency</b> |              |              |              |              |
| Proportion of significant paired t-tests (%)                 | 3.5          | 2.8          | 2.8          | 5.7          |
| Dependent pairs of items (n)                                 | 0            | 0            | 0            | 0            |

Please enter figure 3. Item Person map for item set 1

Please enter figure 4. Item Person map for item set 2.

Please enter figure 5. Item Person map for item set 3

Please enter figure 6. Item Person map for item set 4

### Individual person and item fit

We identified few persons with misfit. Likewise, we identified only two items with potential misfit in set 1, and one item in the remaining three sets (see table 2).

1  
2  
3 Overall, most items fit well to the Rasch model. However, out of the 88 items, seventeen items were  
4 found to have poor model fit. The findings resulting from the distractor analyses, also suggested that  
5 many of the items would be improved by deleting or revising response options.  
6  
7

8  
9 In set 1 (the only set applied in both Uganda and Norway), five items displayed uniform DIF and one  
10 item displayed non-uniform DIF associated with setting (i.e., Norway and Uganda). Across the four sets  
11 including 88 items, six items displayed uniform DIF associated with age, and 7 items indicated DIF  
12 associated with reading ability.  
13  
14  
15

### 16 17 18 19 **Multidimensionality and response dependency**

20 We did not observe any statistically significant residual correlation between pairs of items, and the  
21 paired *t*-test procedure indicated that the sets were sufficiently unidimensional (Table 2).  
22  
23  
24

## 25 26 27 **Discussion**

28 We have developed the Claim Evaluation Tools database using qualitative and quantitative feedback  
29 from methodologists and end-users in six countries (23). This study reports the findings of the first  
30 psychometric testing of multiple-choice items from the database, using Rasch analysis conducted in two  
31 settings, Uganda and Norway.  
32  
33  
34  
35

36 Most of the 88 items (addressing 22 Key Concepts) conformed well to the Rasch model. However some  
37 items displayed DIF and required revisions. Overall, we found that the four item sets created from the  
38 Claim Evaluation Tools database had acceptable reliability. We did not identify significant response  
39 dependence between any pairs of items and, the magnitude of multidimensionality in the data was  
40 acceptable.  
41  
42  
43  
44  
45

46 Based on findings from previously reported descriptive and qualitative methods, experts and end-users  
47 suggested that the items were potentially difficult for members in our target group (23). The Rasch  
48 analyses confirmed this. Furthermore, using the reading items we developed, the respondents reading  
49 skills were found to be low. It should be noted that these items have not previously been tested, and  
50 served as a pragmatic indicator of the respondents' ability to identify and apply the correct text in  
51 response to questions relating to a scenario similar to what we use in the multiple-choice items. We also  
52  
53  
54  
55  
56  
57

1  
2  
3 explored DIF by reading ability. Only seven out of 88 items displayed evidence of DIF, suggesting that  
4 most items work in the same way independent of people's reading ability as measured in this study.  
5  
6

7 This suggests that efforts should be made to simplify the text in the scenarios and editing the response  
8 options to improve readability and improve validity. Reducing the number of response options in the  
9 items could also contribute to making the items less difficult.  
10  
11

12  
13 Based on the findings from our analyses, we decided to remove items with non-uniform DIF from the  
14 Claim Evaluation Database. We also decided to revise items with poor model fit and reduce response  
15 options that did not work as expected. Revised items will be retested in the Ugandan context, where  
16 they will be used as an outcome measure.  
17  
18  
19

20  
21 A limitation of this study is that we tested the items in only two settings, Uganda and Norway, and that  
22 the fit to the Rasch model in other settings is unknown. Further testing of items from the Claim  
23 Evaluation Tools database using Rasch Analysis in other countries and languages is needed. We also did  
24 not include the respondents' gender in the analysis, which could introduce further DIF. This will be  
25 explored in further testing.  
26  
27  
28  
29

30  
31 There has been an encouraging interest in the Claim Evaluation Tools database in settings other than the  
32 countries included in the IHC project, and researchers in Norway, Mexico, Germany and China are  
33 currently translating and testing the multiple-choice items in their settings. In addition, the items  
34 addressing the Key Concepts we judged to be more advanced, and which were not tested as part of this  
35 study, are currently being tested online through [www.testingtreatments.org](http://www.testingtreatments.org), targeting people with  
36 relevant training, such as health researchers or teachers of evidence-based medicine. We are also  
37 developing items to assess intended behaviours and attitudes towards assessing treatment claims. The  
38 Claim Evaluation Tools database, which includes all of these questions, as well as findings from  
39 evaluations such as this one, is freely available for non-commercial use on request through the Testing  
40 Treatments interactive website ([www.testingtreatments.org](http://www.testingtreatments.org)).  
41  
42  
43  
44  
45  
46  
47  
48

49  
50 When used for evaluating peoples' ability to assess treatment claims, an item set generated from the  
51 Claim Evaluation Tools database can be scored by calculating the number or percentage of correct  
52 responses. However, such scores can be difficult to interpret, especially when comparing the average  
53 score of two groups (e.g. in a randomised trial). An absolute (criterion referenced) standard for a passing  
54  
55  
56  
57

1  
2  
3 score (i.e. a cut-off for passing) or for mastery of the Key Concepts that are tested. Setting a cut-off  
4 requires judgement, and there are several ways of doing this (43-45). For the items that will be used in  
5 the trials of the IHC primary school resources and podcast, we have established criteria referenced  
6 standards using a combination of Nedelsky's and Angoff's methods (43-46).  
7  
8  
9

## 10 11 12 **Conclusion**

13  
14 We found that most items that we tested had satisfactory fit to the Rasch model. Taken together with  
15 our previously reported findings, the findings of this study suggest that the items have face and  
16 construct validity in the settings in which they have been tested. Following revisions of some items,  
17 informed by the findings from this study, most of the items that we tested are suitable for use in an  
18 outcome measure that evaluates people's ability to apply the key concepts they need to know to be able  
19 to assess treatment claims.  
20  
21  
22  
23  
24  
25  
26  
27

## 28 **Authors' contributions**

29  
30 AA, ØG, AO wrote the protocol and the IHC group provided comments to this protocol. The Claim  
31 Evaluation Tools database was developed by the IHC group. AA coordinated all of the development and  
32 evaluation process with support from AO. DS, AN and KO performed the data collection and data entry  
33 from the field-testing. ØG and AA prepared the data files for the analysis, and conducted the Rasch  
34 analyses. AA authored this manuscript with significant input from the IHC group.  
35  
36  
37  
38  
39  
40  
41  
42

## 43 **Acknowledgements**

44  
45  
46 We are deeply grateful to all of the enthusiastic children, parents and teachers that contributed to this  
47 project. We would also like to thank the IHC advisory panel, and the other researchers and  
48 methodologists that provided their advice in the development process.  
49  
50  
51  
52  
53

## 54 **Funding and competing interests**

1  
2  
3 The IHC project is funded by the Research Council of Norway- GLOBVAC project 220603. The authors  
4 declare no conflicting interests.  
5  
6  
7  
8

## 9 Ethical approval

10 The research was approved by the Makerere University School of Medicine Research and Ethics  
11 Committee and the Uganda National Council for Science and Technology.  
12  
13

## 14 Data sharing statement

15 All data are published as part of this study; additional information is available upon request and on our  
16 website [informedhealthchoices.org](http://informedhealthchoices.org). All items in the Claim Evaluation Tools Database are available upon  
17 request for non-commercial use.  
18  
19  
20  
21  
22  
23

## 24 References

- 25 1. Lewis M, Orrock P, Myers S. Uncritical reverence in CM reporting: Assessing the scientific quality  
26 of Australian news media reports. *Health Sociology Review*. 2010;19(1):57-72.
- 27 2. Glenton C, Paulsen E, Oxman A. Portals to Wonderland? Health portals lead confusing  
28 information about the effects of health care. *BMC Medical Informatics and Decision Making*. 2005;5:7:8.
- 29 3. Moynihan R, Bero L, Ross-Degnan D, Henry D, Lee K, Watkins J, et al. Coverage by the news  
30 media of the benefits and risks of medications. *The New England Journal of Medicine*.  
31 2000;342(22):1645-50.
- 32 4. Wolfe R, Sharp L, Lipsky M. Content and design attributes of antivaccination web sites. *Journal*  
33 *of American Medical Association*. 2002;287(24):3245-48.
- 34 5. Woloshin S, Schwartz L, Byram S, Sox H, Fischhoff B, Welch H. Women's understanding of the  
35 mammography screening debate. *Archives of Internal Medicine* 2000;160:1434-40.
- 36 6. Fox S, Duggan M. Health Online 2013 09.04.2013. Available from:  
37 <http://www.pewinternet.org/Reports/2013/Health-online.aspx>.
- 38 7. Robinson E, Kerr C, Stevens A, Lilford R, Brauholtz D, Edwards S, et al. Lay public's  
39 understanding of equipoise and randomisation in randomised controlled trials. *Research Support, Non-*  
40 *U.S. Gov't. NHS R&D HTA Programme, 2005 Mar. Report No.: 1366-5278 (Linking) Contract No.: 8.*
- 41 8. Silience E, Briggs P, Harris PR, Fishwick L. How do patients evaluate and make use of online  
42 health information? *Social Science & Medicine*. 2007;64(9):1853-62.
- 43 9. Horsley T, Hyde C, Santesso N, Parkes J, Milne R, Stewart R. Teaching critical appraisal skills in  
44 healthcare settings. *Cochrane Database of Systematic Reviews*. 2011(11).
- 45 10. Evans I, Thornton H, Chalmers I, P. G. *Testing Treatments: better research for better healthcare.*  
46 *Second edition. London: Pinter & Martin Ltd 2011. Available from: Available online at*  
47 [www.testingtreatments.org/new-edition/](http://www.testingtreatments.org/new-edition/).
- 48 11. Chalmers I., Glasziou P., Badenoch D., Atkinson P., Austvoll-Dahlgren A., Oxman A. Evidence Live  
49 2016: Promoting informed healthcare choices by helping people assess treatment claims. *BMJ*;  
50 26.06.2016.  
51  
52  
53  
54  
55  
56



- 1
  - 2
  - 3
  - 4
  - 5
  - 6
  - 7
  - 8
  - 9
  - 10
  - 11
  - 12
  - 13
  - 14
  - 15
  - 16
  - 17
  - 18
  - 19
  - 20
  - 21
  - 22
  - 23
  - 24
  - 25
  - 26
  - 27
  - 28
  - 29
  - 30
  - 31
  - 32
  - 33
  - 34
  - 35
  - 36
  - 37
  - 38
  - 39
  - 40
  - 41
  - 42
  - 43
  - 44
  - 45
  - 46
  - 47
  - 48
  - 49
  - 50
  - 51
  - 52
  - 53
  - 54
  - 55
  - 56
  - 57
  - 58
  - 59
  - 60
12. Taking shared decision making more seriously. *Lancet*. 2011;377(9768):784.
13. Stacey D, Légaré F, Col NF, Bennett CL, Barry MJ, Eden KB, et al. Decision aids for people facing health treatment or screening decisions. *Cochrane Database of Systematic Reviews* 2014, Issue 1 Art No: CD001431 DOI: 101002/14651858CD001431pub4.
14. Berkman N, Sheridan S, Donahue K, Halpern D, Crotty K. Low Health Literacy and Health Outcomes: An Updated Systematic Review. *Annals of Internal Medicine*. 2011;155(2):97-U89.
15. Austvoll-Dahlgren A, Nsangi A, Semakula D. Interventions and assessment tools addressing key concepts people need to know to appraise claims about treatment effects: a systematic mapping review. *Systematic Reviews* 2016;5:215.
16. Abrami PC, Bernard RM, Borokhovski E, Waddington DI, Wade CA, T. P. Strategies for Teaching Students to Think Critically: A Meta-Analysis. *Review of Educational Research* June 2015, Vol 85, No 2, pp 275– 314.
17. Sorensen K, Van den Broucke S, Fullam J, Doyle G, Pelikan J, Slonska Z, et al. Health literacy and public health: a systematic review and integration of definitions and models. *BMC Public Health*. 2012;12:80.
18. Sackett DL, Rosenberg WM, Gray JA, Haynes RB, Richardson WS. Evidence based medicine: what it is and what it isn't. *BMJ*. 1996;312(7023):71-2.
19. Guyatt GH, Oxman AD, Schunemann HJ, Tugwell P, Knottnerus A. GRADE guidelines: A new series of articles in the *Journal of Clinical Epidemiology*. *J Clin Epidemiol*. 2011;64(4):380-82.
20. Nsangi A., Semakula D., Oxman M., Austvoll-Dahlgren A., Rosenbaum S., Kaseje M., et al. Evaluation of resources to teach children in low income countries to assess claims about treatment effects. Protocol for a randomized trial. Submitted manuscript. 2016.
21. Semakula D., Nsangi A., Oxman M., Austvoll-Dahlgren A., Rosenbaum S., Kaseje M., et al. Can an educational podcast improve the ability of parents of primary school children to assess claims about the benefits and harms of treatments? Protocol for a randomized trial Submitted manuscript. 2016.
22. Austvoll-Dahlgren A, Oxman AD, Chalmers I, Nsangi A, Glenton C, Lewin S, et al. Key concepts that people need to understand to assess claims about treatment effects. *Journal of Evidence-Based Medicine*. 2015;8(3):112-25.
23. Austvoll-Dahlgren A, Semakula D, Nsangi A, Oxman A, Chalmers I, Rosenbaum S, et al. Measuring ability to assess claims about treatment effects: The development of the "Claim Evaluation Tools". Accepted manuscript *BMJ open*. 2016.
24. Case S, Swanson D. *Constructing Written Test Questions For the Basic and Clinical Sciences* (Third edition). Philadelphia, USA: 2002.
25. Hobart JC, Cano SJ, Zajicek JP, Thompson AJ. Rating scales as outcome measures for clinical trials in neurology: problems, solutions, and recommendations. *Lancet Neurol*. 2007;6(12):1094-105.
26. Nsangi A, Semakula D, Oxman AD, Sewankambo NK. Teaching children in low-income countries to assess claims about treatment effects: prioritization of key concepts. *Journal of Evidence-Based Medicine*. 2015;8(4):173-80.
27. Semakula D, Nsangi A, Oxman AD, Sewankambo NK. Priority setting for resources to improve the understanding of information about claims of treatment effects in the mass media. *Journal of Evidence-Based Medicine*. 2015;8(2):84-90.
28. Linacre J. Sample size and item calibration stability. *Rasch Measurement Transactions*. 1994;7:328.
29. Lexile-to-Grade Correspondence. MetaMetrics. 2017. <https://www.lexile.com/about-lexile/grade-equivalent/grade-equivalent-chart/>

- 1  
2  
3 30. Leonard M. Rasch Promises: a Layman's Guide to the Rasch Method of Item Analysis. Educational Research. 1980;22(3):188-92.
- 4  
5  
6 31. Tennant A, Conaghan PG. The Rasch measurement model in rheumatology: what is it and why use it? When should it be applied, and what should one look for in a Rasch paper? Arthritis Rheum. 2007;57(8):1358-62.
- 7  
8  
9 32. Guttersrud O, Dalane JO, Pettersen S. Improving measurement in nutrition literacy research using Rasch modelling: examining construct validity of stage-specific 'critical nutrition literacy' scales. Public Health Nutr. 2014;17(4):877-83.
- 10  
11  
12 33. Conaghan PG, Emerton M, Tennant A. Internal construct validity of the Oxford Knee Scale: evidence from Rasch measurement. Arthritis Rheum. 2007;57(8):1363-7.
- 13  
14  
15 34. Rasch analysis. <http://www.rasch-analysis.com/>. Accessed 2016.
- 16  
17 35. Tennant A, McKenna SP, Hagell P. Application of Rasch analysis in the development and application of quality of life instruments. Value Health. 2004;7 Suppl 1:S22-6.
- 18  
19 36. Psylab Group. Introductory Rasch Analysis Using RUMM2030. The Section of Rehabilitation Medicine. University of Leeds: 2016.
- 20  
21 37. Displaying the RUMM2030 Analysis. Rasch Unidimensional Measurement Model. 2015.
- 22  
23 38. Brodersen J, Meads D, Kreiner S, Thorsen H, Doward L, McKenna S. Methodological aspects of differential item functioning in the Rasch model. J Med Econ. 2007;10:309 – 24.
- 24  
25 39. Marais I, Andrich D. Formalizing dimension and response violations of local independence in the unidimensional Rasch model. J Appl Meas. 2008;9(3):200-15.
- 26  
27 40. RUMM. Extending the RUMM2030 Analysis. 7. ed: RUMM Laboratory Pty Ltd. 2009.
- 28  
29 41. Hagell P. Testing Rating Scale Unidimensionality Using the Principal Component Analysis (PCA)/t-Test Protocol with the Rasch Model: The Primacy of Theory over Statistics. Open Journal of Statistics. 2014
- 30  
31 42. Andrich D., Humphry SM., Marais I. Quantifying local, response dependence between two polytomous items using the. Applied Psychological Measurement 36(4), 309–324. 2012.
- 32  
33 43. Livingston SA ZM. Passing scores; A manual for setting standards of performance on educational and occupational tests. Educational Testing Service. 1982.
- 34  
35 44. Nedelsky L. Absolute grading standards for objective tests. Education and Psychological Measurement Journal. 1954;14(1):3-19.
- 36  
37 45. Angoff WH. 4. Angoff WH. Scales, norms, and equivalent scores. In: Thorndike RL (ed.). Educational Measurement Washington DC. 1971:514-5.
- 38  
39 46. Davies A., Gerrity M., Nordheim L., Okebukola P., Opiyo N., Sharples J., et al. Measuring ability to assess claims about treatment effects: establishment of a standard for passing and mastery. IHC Working Paper 2017; ISBN 978-82-8082-802-6.

#### Figure legends

46  
47 *Figure 1. Example of a multiple choice-item taken from the Claim Evaluation Tools database*

48 *Figure 2. The Item Characteristic Curve*

49 *Figure 3. Item Person map for item set 1*

50 *Figure 4. Item Person map for item set 2.*

51 *Figure 5. Item Person map for item set 3*

52 *Figure 6. Item Person map for item set 4*

1  
2  
3  
4  
5  
6  
7  
8  
9  
10  
11  
12  
13  
14  
15  
16  
17  
18  
19  
20  
21  
22  
23  
24  
25  
26  
27  
28  
29  
30  
31  
32  
33  
34  
35  
36  
37  
38  
39  
40  
41  
42  
43  
44  
45  
46  
47  
48  
49  
50  
51  
52  
53  
54  
55  
56  
57  
58  
59  
60

For peer review only

1  
2  
3  
4  
5  
6  
7  
8  
9  
10  
11  
12  
13  
14  
15  
16  
17  
18  
19  
20  
21  
22  
23  
24  
25  
26  
27  
28  
29  
30  
31  
32  
33  
34  
35  
36  
37  
38  
39  
40  
41  
42  
43  
44  
45  
46  
47  
48  
49  
50  
51  
52  
53  
54  
55  
56  
57  
58  
59  
60

**21.** A review summarized studies comparing playing sports with other ways of making people happy. The review authors included all studies that found that sports improve people's happiness. Based on these studies, the review authors said that sport definitely improves happiness.

*Question:* **Do you agree with what the review authors said?**

*Options:*

- A) It is not possible to say without knowing the opinion of sports experts
- B) No. The review authors included only those studies with favorable results
- C) Yes. The review authors were sure that sports improves happiness
- D) Yes, the review authors included all of the studies with favorable results

**Answer:**

Figure 1. Example of a multiple choice-item taken from the Claim Evaluation Tools database

162x123mm (300 x 300 DPI)

1  
2  
3  
4  
5  
6  
7  
8  
9  
10  
11  
12  
13  
14  
15  
16  
17  
18  
19  
20  
21  
22  
23  
24  
25  
26  
27  
28  
29  
30  
31  
32  
33  
34  
35  
36  
37  
38  
39  
40  
41  
42  
43  
44  
45  
46  
47  
48  
49  
50  
51  
52  
53  
54  
55  
56  
57  
58  
59  
60

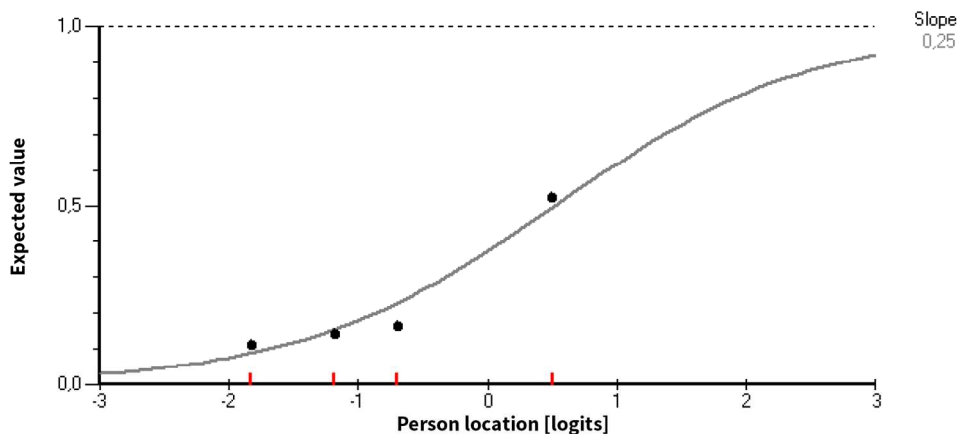

Figure 2. The Item Characteristic Curve

163x82mm (300 x 300 DPI)

review only

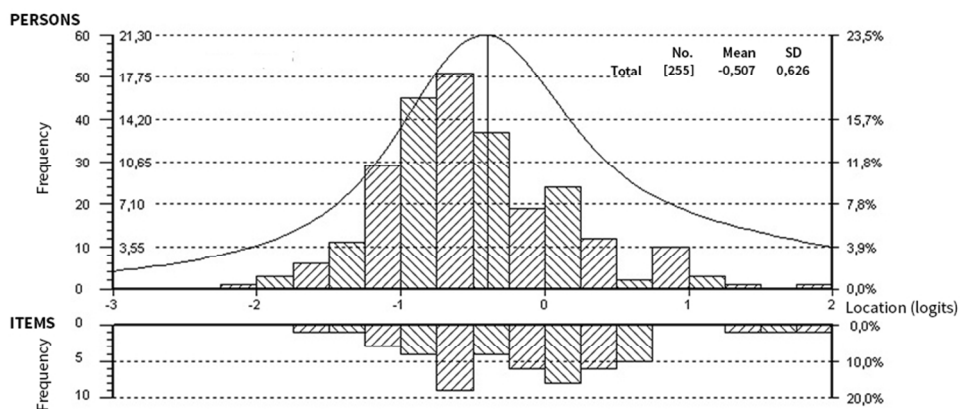

Figure 3. Item Person map for item set 1

82x37mm (300 x 300 DPI)

er review only

1  
2  
3  
4  
5  
6  
7  
8  
9  
10  
11  
12  
13  
14  
15  
16  
17  
18  
19  
20  
21  
22  
23  
24  
25  
26  
27  
28  
29  
30  
31  
32  
33  
34  
35  
36  
37  
38  
39  
40  
41  
42  
43  
44  
45  
46  
47  
48  
49  
50  
51  
52  
53  
54  
55  
56  
57  
58  
59  
60

1  
2  
3  
4  
5  
6  
7  
8  
9  
10  
11  
12  
13  
14  
15  
16  
17  
18  
19  
20  
21  
22  
23  
24  
25  
26  
27  
28  
29  
30  
31  
32  
33  
34  
35  
36  
37  
38  
39  
40  
41  
42  
43  
44  
45  
46  
47  
48  
49  
50  
51  
52  
53  
54  
55  
56  
57  
58  
59  
60



Figure 4. Item Person map for item set 2.

82x37mm (300 x 300 DPI)

1  
2  
3  
4  
5  
6  
7  
8  
9  
10  
11  
12  
13  
14  
15  
16  
17  
18  
19  
20  
21  
22  
23  
24  
25  
26  
27  
28  
29  
30  
31  
32  
33  
34  
35  
36  
37  
38  
39  
40  
41  
42  
43  
44  
45  
46  
47  
48  
49  
50  
51  
52  
53  
54  
55  
56  
57  
58  
59  
60

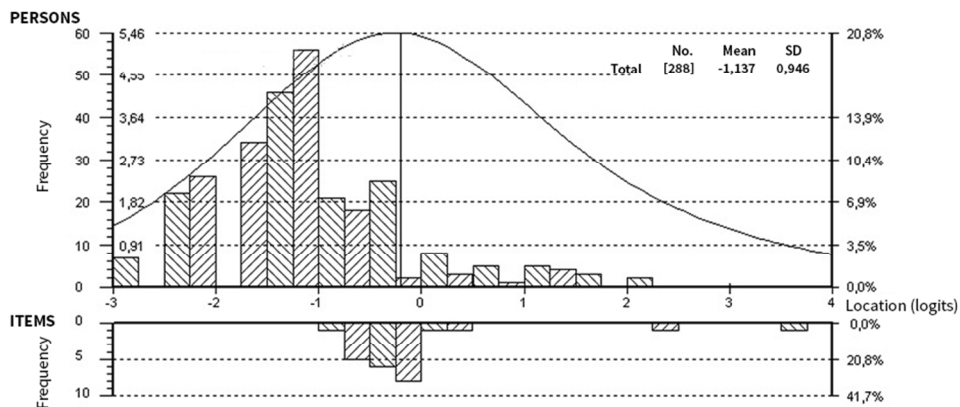

Figure 5. Item Person map for item set 3

82x37mm (300 x 300 DPI)



1  
2  
3  
4  
5  
6  
7  
8  
9  
10  
11  
12  
13  
14  
15  
16  
17  
18  
19  
20  
21  
22  
23  
24  
25  
26  
27  
28  
29  
30  
31  
32  
33  
34  
35  
36  
37  
38  
39  
40  
41  
42  
43  
44  
45  
46  
47  
48  
49  
50  
51  
52  
53  
54  
55  
56  
57  
58  
59  
60

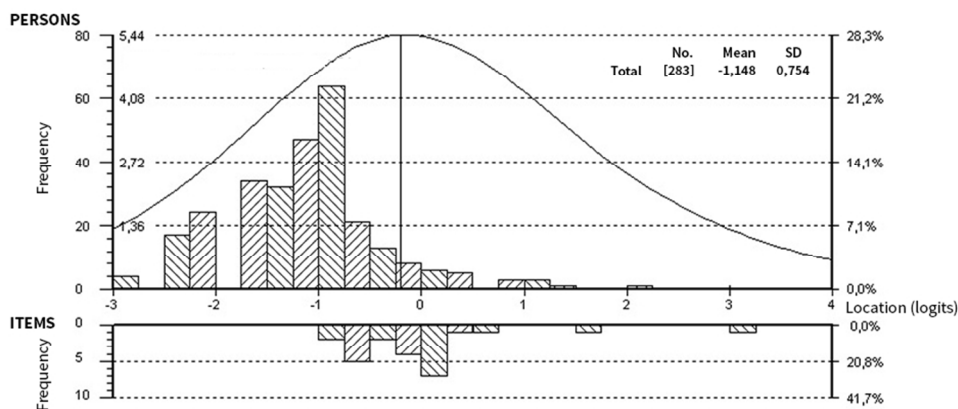

Figure 6. Item Person map for item set 4

82x37mm (300 x 300 DPI)

1  
2  
3  
4  
5  
6  
7  
8  
9  
10  
11  
12  
13  
14  
15  
16  
17  
18  
19  
20  
21  
22  
23  
24  
25  
26  
27  
28  
29  
30  
31  
32  
33  
34  
35  
36  
37  
38  
39  
40  
41  
42  
43  
44  
45  
46  
47  
48  
49  
50  
51  
52  
53  
54  
55  
56  
57  
58  
59  
60

**1.** A doctor did a study to find out if drinking tea keeps people from getting sick. The doctor tossed a coin to decide who should get the tea and who should not. People who got tea went to the doctor's office every day to drink their tea. At the end of the study, people who got the tea were less likely to be sick than those who got no tea.

*Based on the text above, please answer the following questions:*

**1.1 Who went to the doctor's office every day?**

*Options:*

- A) People who did not get tea
- B) People who got tea
- C) Everyone
- D) People who got sick

**Answer:**

**1.2. How did the doctor decide who should get tea?**

*Options:*

- A) By tossing a coin
- B) By asking people what they would like
- C) They gave tea to those who were more likely to be sick
- D) They asked people who came to their office

**Answer:**

**1.3. What was the treatment?**

*Options:*

- A) Tea
- B) Sleep
- C) The study
- D) The doctors

**Answer:**

**1.4. What was the result of the study?**

*Options:*

- A) Drinking tea can help people from getting sick
- B) Doctors should toss coins when doing studies
- C) People should go to the doctor if they are sick
- D) Not drinking tea can help people from getting sick

**Answer:**
