# Supplementary material for: Measuring ability to assess claims about treatment effects: a latent trait analysis of items from the ‘Claim Evaluation Tools’ database using Rasch modelling
Source: PubMed Central journal article supplement — BMJ Open. 2017 May 25;7(5):e013185. doi: 10.1136/bmjopen-2016-013185 (PMC5777469; doi:10.1136/bmjopen-2016-013185), 2017-05-25
Supplement: bmjopen-2016-013185supp001.pdf [file bmjopen-2016-013185supp001.pdf]

**1.** A doctor did a study to find out if drinking tea keeps people from getting sick. The doctor tossed a coin to decide who should get the tea and who should not. People who got tea went to the doctor's office every day to drink their tea. At the end of the study, people who got the tea were less likely to be sick than those who got no tea.

*Based on the text above, please answer the following questions:*

**1.1 Who went to the doctor's office every day?**

*Options:*

- A) People who did not get tea
- B) People who got tea
- C) Everyone
- D) People who got sick

**Answer:**

**1.2. How did the doctor decide who should get tea?**

*Options:*

- A) By tossing a coin
- B) By asking people what they would like
- C) They gave tea to those who were more likely to be sick
- D) They asked people who came to their office

**Answer:**

**1.3. What was the treatment?**

*Options:*

- A) Tea
- B) Sleep
- C) The study
- D) The doctors

**Answer:**

**1.4. What was the result of the study?**

*Options:*

- A) Drinking tea can help people from getting sick
- B) Doctors should toss coins when doing studies
- C) People should go to the doctor if they are sick
- D) Not drinking tea can help people from getting sick

**Answer:**
